# Supplementary material for: Highly Variable and Non-complex Diazotroph Communities in Corals From Ambient and High CO2 Environments
Source: Frontiers journal article supplement (doi:10.3389/fmars.2021.754682), 2021-10-28
Supplement: Data_Sheet_2.xlsx [file Data_Sheet_2.xlsx]

## Sheet: Supplementary Data 1
											Sequence ID	a-06-06-18-galaxea-ctl-1	a-06-06-18-galaxea-ctl-2	a-06-06-18-galaxea-ctl-3	a-06-06-18-galaxea-ctl-5	a-06-06-18-galaxea-vents-1	a-06-06-18-galaxea-vents-3	a-06-06-18-galaxea-vents-5	a-06-06-18-porites-ctrl1	a-06-06-18-porites-vents-1	a-06-06-18-porites-vents-2	a-06-06-18-porites-vents-3	a-06-06-18-porites-vents-4	a-06-06-18-porites-vents-5	a-06-06-18-rna-porites-2-	a-06-06-18-rna-porites-ctrl1	a-28-05-18-as-1-1	a-28-05-18-as-2-1	a-28-05-18-as-3-1	a-28-05-18-as-8-2	a-28-05-18-pd-1-1	a-28-05-18-pd-2-1	a-28-05-18-pd-3-1	a-28-05-18-pd-4-1	a-28-05-18-pd-5-1	a-28-05-18-pd-8-2	a-28-05-18-pd-9-2	a-30-05-18-as-1-1	a-30-05-18-as-1-2	a-30-05-18-as-2-1	a-30-05-18-as-2-2	a-30-05-18-as-3-1	a-30-05-18-as-3-2	a-30-05-18-as-4-2	a-30-05-18-pd-4-1	a-30-05-18-pd-5-1	a-30-05-18-pd-5-2	a-30-05-18-pd-6-1	a-30-05-18-pd-6-2
											Sample ID	gf_ctrl_1	gf_ctrl_2	gf_ctrl_3	gf_ctrl_5	gf_seep_1	gf_seep_3	gf_seep_5	pr_ctrl_1	pr_seep_1	pr_seep_2	pr_seep_3	pr_seep_4	pr_seep_5	pr_ctrl_2	pr_ctrl_3	as_ctrl_2	as_ctrl_3	as_ctrl_4	as_ctrl_9	pd_ctrl_2	pd_ctrl_3	pd_ctrl_4	pd_ctrl_5	pd_ctrl_6	pd_ctrl_8	pd_ctrl_9	as_seep_1	as_seep_2	as_seep_3	as_seep_4	as_seep_5	as_seep_6	as_seep_7	pd_seep_1	pd_seep_2	pd_seep_3	pd_seep_4	pd_seep_5
OTU ID	nifH cluster CART	Zehr db % ident.	Zehr db evalue	sseqid	Zehr genus species	Zehr taxonomy	nr % ident.	nr evalue	nr annot. [species]	nr accession	representative sequence	a060618galaxeactl1	a060618galaxeactl2	a060618galaxeactl3	a060618galaxeactl5	a060618galaxeavents1	a060618galaxeavents3	a060618galaxeavents5	a060618poritesctrl1	a060618poritesvents1	a060618poritesvents2	a060618poritesvents3	a060618poritesvents4	a060618poritesvents5	a060618rnaporites2	a060618rnaporitesctrl1	a280518as11	a280518as21	a280518as31	a280518as82	a280518pd11	a280518pd21	a280518pd31	a280518pd41	a280518pd51	a280518pd82	a280518pd92	a300518as11	a300518as12	a300518as21	a300518as22	a300518as31	a300518as32	a300518as42	a300518pd41	a300518pd51	a300518pd52	a300518pd61	a300518pd62
OTU_00	1F	95.238	3.2e-86	ArcNitr5	Arcobacter nitrofigilis	Bacteria;Proteobacteria;Epsilonproteobacteria;Campylobacterales;Campylobacteraceae;Arcobacter	97.619	7.55e-90	TPA: nitrogenase reductase, partial [Campylobacterales bacterium]	HHS92923.1	ATCAACTACATCTCAAAATACTTTAGCAGCAATGTGTCACTACTATGGAAAGAAGATTTTAATTGTTGGGTGTGACCCAAAAGCAGATTCAACTAGACTTATCTTACACGAAAAAGCACAATCAACTATTATGCAACTAGCAAGTGAGGCTGGAACAGTTGAAGATTTAGAGTTAGAAGATGTGTGTAAACCAGGTGCTGATGAATTCCATCCAGATAATGAAGATATTACTGAAGGTTATATTATGTGTACTGAGTCTGGTGGTCCTGAGCCAGGTGTTGGTTGCGCTGGACGTGGGGTTATTACAGCAATTAACTTCTTAGAAGAAGAGGGTGCATATGATGATGAGTTAGACTTCGTATCTTATGATGTACTTGGA	0	0	0	0	0	0	0	0	0	0	0	0	0	0	0	0	0	0	0	0	0	0	0	0	0	0	0	0	0	0	0	0	0	0	3703	0	0	0
OTU_01	1K	92.063	5.59e-84	ArcNitr5	Arcobacter nitrofigilis	Bacteria;Proteobacteria;Epsilonproteobacteria;Campylobacterales;Campylobacteraceae;Arcobacter	96.032	1.73e-88	nitrogenase reductase [Sulfurovum sp. FS08-3]	KIM06297.1	ATCTACTACTTCTCAAAATACGTTAGCGGCTATGTGTCACTATTATGGTAAGAAAATTTTAATTGTAGGTTGTGACCCAAAAGCGGATTCAACTAGACTTATTTTACATGAGAAAGCTCAAGCTACTATTATGCAACTTGCTTCAGAAGCTGGTACAGTTGAAGATCTTGAGTTAGAAGATGTATGTAAGCCAGGTGCGGATGAGTTCCACCCAGATAATGAAGAGATTACAGATGGTTTCATTATGTGTACTGAGTCTGGTGGTCCTGAGCCAGGTGTTGGTTGTGCTGGTAGAGGGGTTATTACAGCTATTAATTTCTTAGAAGAAGAGGGTGCTTATGATGACGATTTAGATTTCGTTTCTTATGACGTACTTGGA	0	0	0	0	1	0	0	14114	0	0	0	0	0	312	0	0	0	0	0	0	0	0	0	0	0	0	0	0	0	0	0	0	0	0	0	0	0	0
OTU_02	1G	96.46	6.35e-77	TerTurn2	Teredinibacter turnerae	Bacteria;Proteobacteria;Gammaproteobacteria;Alteromonadales;Alteromonadalesgeneraincertaesedis;Teredinibacter	98.23	1.02e-77	nitrogenase iron protein [Pseudomonadales bacterium]	MAR89781.1	ATCGACCACAACACAGAATTTAGTGGCTGCCCTTGCGGAAGCGGGCAAAAAAGTCATGATCGTTGGTTGCGATCCGAAAGCGGATTCAACACGCTTAATCCTACACGCAAAAGCGCAAAACACCATTATGGAAATGGCGGCTGAAGCAGGCACAGTAGAAGATCTAGAACTCGAAGATGTACTTAAGTCTGGTTACGGTGATATTCGTTGTGTTGAATCGGGTGGCCCTGAGCCAGGTGTTGGCTGTGCAGGTCGCGGCGTCATTACCGCGATTAACTTCTTGGAAGAAGAAGGTGCTTACGAAGAAGATCTTGATTTTGTTTTCTATGATGTACTTGGC	0	0	0	0	0	0	0	0	0	0	0	0	0	0	0	0	0	0	0	0	89408	0	1	1	0	0	0	0	0	0	0	0	0	0	0	0	0	0
OTU_03	1G	96.46	2.38e-77	TerTurn2	Teredinibacter turnerae	Bacteria;Proteobacteria;Gammaproteobacteria;Alteromonadales;Alteromonadalesgeneraincertaesedis;Teredinibacter	95.575	3.26e-78	nitrogenase reductase, partial [Vibrio natriegens NBRC 15636 = ATCC 14048 = DSM 759]	AAD55588.1	ATCCACAACGACCCAAAACCTGGTAGCTGCTTTGGCAGAGGCTGGTAAACGAGTAATGATCGTGGGTTGCGATCCCAAAGCAGACTCTACCCGTTTGATTCTGCATTCAAAAGCACAAAACACCATTATGGAAATGGCGGCCGAAGCGGGTACCGTTGAAGATTTGGAATTGGAAGATGTACTGAAAGTGGGTTATGGCGATGTGCGTTGCGTTGAATCCGGTGGCCCGGAGCCTGGAGTGGGATGTGCAGGCCGTGGTGTTATTACCGCTATTAACTTCTTGGAAGAAGAAGGTGCCTACGAAGATGACATCGATTTTGTTTTCTATGACGTACTGGGT	0	0	0	0	0	0	0	0	0	0	0	0	0	198	0	0	1	0	0	39404	0	1	0	0	0	1	0	0	0	0	0	0	0	0	0	0	0	0
OTU_04	4G	46.491	2.13e-29	CloLjun5	Clostridium ljungdahlii	Bacteria;Firmicutes;Clostridia;Clostridiales;Clostridiaceae;Clostridium	100	3.05e-80	chlorophyllide a reductase iron protein subunit X, partial [Rhodobacteraceae bacterium]	NCW53414.1	GTCCTTCACACTGGCCAATCTCAGCCACATGATGGCCGAGCAGGGCAAGCGCGTTTTGCTGATCGGCTGTGACCCGAAATCCGACACGACCTCTTTGCTGTTCGGTGGGAAGGCCTGCCCGACAATCATCGAAACCTCGACCAAAAAGAAACTGGCCGGGGAAGAGGTGAAGATCGGCGATGTCTGCTTCAAGCGGGGCGGTGTGTTCGCAATGGAGCTGGGCGGTCCTGAGGTTGGTCGCGGCTGTGGTGGTCGCGGGATCATCCACGGGTTCGAACTGCTCGAAAAGCTGGGCTTCCACGATTGGGATTTCGACTACGTCCTCCTCGACTTCCTGGGC	0	0	0	0	0	0	0	0	0	0	0	7554	0	0	0	0	0	0	0	0	0	0	0	0	0	0	0	0	0	0	0	0	0	0	0	0	0	0
OTU_05	1O	92.035	3.81e-73	PseStut3	Pseudomonas stutzeri	Bacteria;Proteobacteria;Gammaproteobacteria;Pseudomonadales;Pseudomonadaceae;Pseudomonas	94.69	1.66e-76	nitrogenase iron protein, partial [Methylomonas sp. R-49807]	CCW45958.1	GTCCACCACCACCCAAAACCTGGTGGCGGCTCTCGCCGAAGCCGGTAAGAAAGTTATGATCGTCGGCTGTGATCCGAAGGCCGATTCCACCCGCTTGATCCTGCACTCTAAGGCTCAAGAAACCATCATGCACTTGGCTGCTGATGCGGGTTCCGTTGAAGATCTGGAACTGGAAGACGTTCTGAAAGCCGGCTACGCCGACATCAAGTGCGTTGAGTCCGGTGGTCCGGAGCCAGGCGTTGGTTGCGCCGGTCGTGGTGTTATCACCGCCATCAACTTCCTCGAAGAAGAAGGTGCTTACGAAGAAGACCTCGACTTCGTGTTCTACGACGTTCTTGGT	0	6234	9	2396	14182	113	5	0	0	0	0	0	0	0	0	0	0	0	0	0	0	0	0	1	0	0	0	0	0	0	0	0	0	0	0	0	1	0
OTU_06	4G	42.982	1.72e-26	MrvForm2	Marvinbryantia formatexigens	Bacteria;Firmicutes;Clostridia;Clostridiales;Lachnospiraceae;Marvinbryantia	97.345	2.85e-78	chlorophyllide a reductase iron protein subunit X [Rhodospirillales bacterium 20-64-7]	OYV35318.1	GTCTTTCACGCTGGCCAACCTCTCTTACATGATGGCCCAGCAGGGCAAGCGGGTGTTGCTCATCGGATGTGACCCCAAGAGCGACACGACTTCACTGCTGTTCGGCGGGCGCAGCTGCCCGACCATCATTGAAACCTCTTCGCGGAAGAAGCTTGCGGGCGAGGAGGTTCAGATCGGCGATGTCTGTTTCAAGCGCGACGGTGTCTTCGCCATGGAACTGGGCGGCCCGGAGGTCGGACGCGGCTGCGGCGGACGCGGCATCATCCATGGCTTCGAGTTGCTTGAGAAACTCGGTTTCCACGACTGGGGTTTCGACTACGTGCTGCTCGATTTTCTGGGT	0	0	0	0	0	16388	17	0	1	0	133	0	0	0	0	1	0	0	0	0	0	0	0	0	0	0	0	0	0	0	0	0	0	0	0	0	0	0
OTU_07	4G	46.491	1.71e-29	MrvForm2	Marvinbryantia formatexigens	Bacteria;Firmicutes;Clostridia;Clostridiales;Lachnospiraceae;Marvinbryantia	91.15	7.26e-74	BchX [Rhodobacter sphaeroides]	AAF24297.1	GTCCTTCACGCTCGCCAATCTTAGTTACATGATGGCGCAGCAGGGCAAAAAGGTTCTGTTGATTGGTTGCGATCCGAAGAGTGACACGACGTCATTACTGTTTGGCGGGCGCGCCTGTCCAACGATTATTGAAACCTCATCGAAGAAGAAAGAGTCCGGAGAAGAAGTCCAGATCGGTGATGTCTGCTTCAAGCGCGACGGCGTCTACGCAATGGAACTCGGCGGACCCGAGGTCGGTCGCGGCTGTGGCGGTCGGGGCATTATTCATGGGTTCGAGTTGCTCGAAAAGCTCGGCTTCCATGAGTGGGATTTTGACTATGTCCTTCTCGACTTTCTCGGC	0	0	0	0	0	0	0	0	0	0	0	0	0	0	0	0	0	0	0	0	0	0	0	0	0	0	0	0	0	0	0	0	0	0	0	0	0	9582
OTU_08	4G	43.86	1.16e-27	MrvForm2	Marvinbryantia formatexigens	Bacteria;Firmicutes;Clostridia;Clostridiales;Lachnospiraceae;Marvinbryantia	90.265	2.05e-72	BchX [Rhodobacter sphaeroides]	AAF24297.1	GTCCTTCACCCTCTCCAATCTCAGCTACATGATGGCGCAGCAGGGCAAGAAGGTTCTGTTGATCGGTTGCGACCCTAAATCCGACACCACATCTCTTTTGTTCGGCGGTAAGAGCTGCCCGACCATCATCGAAACATCGGGCCGCAAGAAGGCGGCCGGCGAAGAAGTCGGGATCGGCGACGTCTGCTTCGTCCGCGACGGCGTTTACGCCATGGAACTGGGCGGACCCGAGGTCGGGCGTGGCTGTGGCGGCCGCGGGATCATCCACGGTTTCGAACTGATGGAGAAGCTTGGGTTCCACGACTGGGACTTCGACTATGTTCTGCTCGATTTCCTGGGC	0	0	0	0	0	0	0	0	0	0	0	0	0	0	0	0	0	0	1	0	0	0	0	0	0	0	0	0	0	0	1387	0	0	5850	0	0	0	0
OTU_09	4G	44.737	2.23e-29	MrvForm2	Marvinbryantia formatexigens	Bacteria;Firmicutes;Clostridia;Clostridiales;Lachnospiraceae;Marvinbryantia	87.611	2.91e-71	BchX [Rhodobacter sphaeroides]	AAF24297.1	AAGTTTCTCCCTGGCCAATCTATCTTACATGCTCGCGCAAAAAGGTAAAAAAGTCCTCTTGATTGGCTGTGACCCGAAGAGTGATACGACCTCGCTTTTGTTCGGTGGGCGTTCCTGCCCAACCATCATTGAGACATCTTCGAAGAAAAAAGCAGCGGGCGAAGACGTCACAATCTCCGACGTTTGTTTCAAGCGGGATGGCGTTTTTGCCATGGAACTTGGCGGTCCAGATGTCGGGCGCGGCTGCGGTGGTCGTGGCATTATCCATGGCTTTGAACTTCTTGAAAAACTCGGTTTCCATGATTGGGACTTTGATTATGTTTTGCTTGATTTCCTTGGC	0	0	0	0	0	0	0	0	0	0	0	0	0	0	0	0	0	0	9540	0	0	0	0	0	0	1	0	0	0	0	0	0	0	0	0	0	0	0
OTU_10	4G	46.491	7.07e-29	CloLjun5	Clostridium ljungdahlii	Bacteria;Firmicutes;Clostridia;Clostridiales;Clostridiaceae;Clostridium	98.23	5.89e-79	chlorophyllide a reductase iron protein subunit X [SAR116 cluster bacterium]	MAJ96201.1	AAGTTTCACTCTTGCAAATCTTAGTCATATGATGGCAGAACAAGGAAAAAGAGTTCTACTCATAGGATGTGACCCAAAATCTGATACAACTTCTCTCTTGTTCGGGGGAAAGGCTTGCCCAACTATACTTGAAACATCGACAAATAAGAAACTTGCGGGTGAAGAAGTCTCTATTGGAGATGTGTGTTTTAAAAGAAATGGCGTATTTGCGATGGAGCTCGGTGGGCCAGAAGTGGGAAGAGGGTGTGGAGGACGCGGCATAATCCATGGCTTTGAGCTACTGGAAAAGTTAGGGTTTCACGATTGGGATTTTGATTACGTATTATTGGATTTTTTGGGT	0	76	0	0	0	0	0	0	0	0	0	0	0	0	0	0	0	0	0	0	0	0	0	0	0	11034	0	0	0	0	0	0	0	0	0	0	0	0
OTU_11	4G	45.614	7.37e-29	CloLjun5	Clostridium ljungdahlii	Bacteria;Firmicutes;Clostridia;Clostridiales;Clostridiaceae;Clostridium	91.15	6.11e-64	chlorophyllide a reductase iron protein subunit X [Phyllobacteriaceae bacterium]	MAW88469.1	ATCATTCTCGCTTGCCAACCTTTCTTATATGCTGGCGCAGCAGGGCAAGAAGGTCTTGCTCATTGGTTGCGACCCGAAGAGTGACACCACATCGCTGCTGTTCGGCGGTCGTTCCTGTCCGACCATTTTGGAGACATCATCCAAGATGAAAGAAGCAGGCGCTGAGGTGAAAATCTCCGACGTTTGCTTCAAGCGGGATGGCGTATTCGCCATGGAACTTGGCGGACCGGAAGTCGGTCGTGGTTGCGGTGGTCGCGGTATCATTCACGGTTTTGAGCTTCTAGAAAAACTCGGTTTCCACGATTGGGATTTTGATTACGTCTTGCTCGACTTTCTGGGC	0	0	0	0	0	0	0	0	0	0	0	0	0	0	0	0	0	0	0	0	0	0	0	0	0	15353	0	0	0	0	0	0	0	0	0	0	0	0
OTU_12	4G	46.957	2.79e-27	MtdFerv4	Methanocaldococcus fervens	Archaea;Euryarchaeota;Methanococci;Methanococcales;Methanocaldococcaceae;Methanocaldococcus	92.92	1.39e-67	chlorophyllide reductase iron protein subunit X, partial [Gammaproteobacteria bacterium]	NBP08196.1	GAGCTTCACGCTCTCCAATCTCTCGTACATGATGGCGCAGCAGGGCAAGAAGGTCCTGCTGATCGGCTGCGACCCGAAGAGCGATACGACCTCACTGCTGTTCGGCGGTCGCGCCTGTCCGACGATCATCGAAACGACGGCAAAGAAGAAGGCCGCCGGCGAAGAGGTCGAGATCGGCGATGTCTGCTTCAAGCGCGACGGTGTCTTTGCCATGGAGCTCGGAGGGCCCGAGGTCGGCCGGGGGTGTGGCGGTCGCGGGATCATTCACGGTTTCGAAACGCTGGAACGGCTCGGATTCAACGACTGGGGCTTCGACTACGTGCTGCTCGATTTCCTCGGA	0	0	0	0	0	0	0	0	0	0	0	0	0	0	0	0	0	0	0	0	0	7	215	0	0	0	0	0	0	0	0	0	0	0	0	0	4665	0
OTU_13	3N	89.381	2.07e-69	ChlPhae4	Chlorobium phaeobacteroides	Bacteria;Chlorobi;Chlorobia;Chlorobiales;Chlorobiaceae;Chlorobium	88.496	2.84e-69	nitrogenase iron protein [Bacteroidales bacterium]	NJK97911.1	GTCCACCACTACGCAGAATACAGTGGCCGGTTTGGCCGAAATGGGCAAAAAAGTATTGGTTGTGGGTTGTGATCCAAAGGCCGATTCAACTCGGCTTCTTTTGGGCGGATTAGCCCAGAAAACTGTTCTCGATACTCTTCGCGAGGAAGGTGAAGATGTGGAACTGGAAGATATCATCAAAGAAGGATACGGCGAAGCACGGTGTGTGGAATCCGGTGGTCCTGAGCCGGGAGTCGGCTGCGCAGGGCGGGGAATCATTACCTCCATCAATCTTCTTGAGCAGCTAGGAGCCTATGAAGACGGCGACGATCTTGATTATGCCTTCTACGACGTTCTTGGA	208	0	0	4913	0	0	0	0	0	0	0	0	0	0	0	0	0	0	0	0	0	0	0	0	0	0	0	0	0	0	0	0	0	0	0	0	0	0
OTU_14	4G	46.491	2.77e-29	CloLjun5	Clostridium ljungdahlii	Bacteria;Firmicutes;Clostridia;Clostridiales;Clostridiaceae;Clostridium	99.115	3.23e-79	chlorophyllide a reductase iron protein subunit X [Silicimonas sp.]	NNE87976.1	GTCGTTCACTCTGGCCAACCTCAGCCATATGATGGCCGAGCAAGGCAAGCGCGTGCTGCTGATCGGCTGCGATCCGAAATCGGATACGACCTCGCTGCTCTTCGGTGGCAAGGCGTGCCCGACGATCATCGAAACGTCGACGAAGAAGAAGCTGGCGGGTGAGGAGGTCGGCATCGGGGATGTCTGCTTCAAGCGGGGCGGCGTCTTCGCGATGGAGCTGGGTGGACCCGAAGTTGGCCGTGGTTGCGGCGGGCGAGGGATCATCCATGGGTTCGAGCTTCTGGAGAAGCTTGGCTTCCACGACTGGGATTTCGACTATGTCCTGCTGGACTTCCTCGGC	7953	0	0	1	0	5	0	0	0	0	0	0	0	0	0	0	0	0	0	0	0	0	0	0	0	0	0	0	0	0	0	0	0	0	0	0	0	0
OTU_15	1G	94.69	2.99e-75	TerTurn2	Teredinibacter turnerae	Bacteria;Proteobacteria;Gammaproteobacteria;Alteromonadales;Alteromonadalesgeneraincertaesedis;Teredinibacter	97.345	4.7e-78	nitrogenase reductase iron protein, partial [Vibrio cincinnatiensis]	AAF61402.2	ATCTACTACAACTCAAAACCTTGTTGCGGCACTAGCAGAAGCAGGGAAGAAAGTAATGATTATCGGTTGTGACCCTAAAGCGGACTCAACTCGTCTTATCCTACACACTAAAATGCAAAACACTATCATGGAGATGGCTGCTGAAGCAGGTACAGTTGAAGACATCGAACTAGAAGATGTACTACTAACTGGTTACGGCGACGTGAAATGTGTTGAATCAGGTGGTCCAGAGCCAGGTGTTGGTTGTGCGGGTCGTGGTGTAATCACAGCGATTAACTTCTTAGAAGAAGAAGGCGCATACGAAGATGACTTAGACTTCGTATTCTACGACGTACTAGGT	0	0	0	0	0	0	0	0	0	0	0	0	0	0	0	0	0	0	0	0	0	0	0	0	0	0	4177	0	0	0	0	0	0	0	0	0	0	0
OTU_16	4G	42.982	8.27e-27	MrvForm2	Marvinbryantia formatexigens	Bacteria;Firmicutes;Clostridia;Clostridiales;Lachnospiraceae;Marvinbryantia	89.381	3.49e-72	BchX [Rhodobacter sphaeroides]	AAF24297.1	GTCGTTCACGCTCGCCAACCTCTCATACATGATGGCGCAGCAGGACAAGAAGGTGCTTCTGATAGGCTGCGATCCGAAGAGCGACACCACATCGCTCCTTTTCGGCGGCCGCGCCTGCCCGACCATCATCGACACCTCCTCCAAGAGGAAACTCGCCGGTGACGAAGTCTCCATCGGCGACGTGTGCTTCAAACGAGATGGCGTCTTTGCCATGGAATTGGGCGGACCGGAAGTGGGACGCGGCTGCGGCGGGCGCGGCATCATCCATGGTTTTGAGACGCTCGAAAAACTCGGCTTCCACGACTGGGATTTCGACTACGTCCTTCTGGATTTCCTAGGC	0	0	0	0	0	0	0	0	0	0	0	0	0	0	0	0	0	0	0	0	0	0	5118	0	0	0	0	0	0	0	0	0	0	0	0	0	0	0
OTU_17	1G	96.46	3.76e-77	TerTurn2	Teredinibacter turnerae	Bacteria;Proteobacteria;Gammaproteobacteria;Alteromonadales;Alteromonadalesgeneraincertaesedis;Teredinibacter	96.46	1.2e-77	dinitrogenase reductase, partial [Azomonas agilis]	AAF60986.1	ATCAACTACCACTCAGAATTTGGTAGCTGCTTTGGCTGAAGCCGGCAAGAAAGTAATGATTGTTGGTTGTGATCCAAAAGCGGATTCAACTCGTCTGATCCTTCACTCAAAAGCTCAAAACACTATCATGGAAATGGCTGCCGAAGCCGGTACCGTGGAAGATCTTGAGTTAGAAGATGTATTAAAAATTGGTTACGGCAACGTTAAGTGCGTTGAGTCCGGTGGTCCAGAGCCAGGTGTTGGTTGTGCCGGCCGTGGTGTTATCACTGCTATTAACTTTTTAGAAGAAGAAGGCGCTTACGACGATGACCTAGACTTCGTATTCTACGATGTATTGGGT	0	0	8	0	0	0	0	0	0	0	0	0	0	2276	993	0	0	0	0	0	0	0	0	0	0	0	0	0	0	0	0	0	0	0	0	0	0	0
OTU_18	1G	95.575	6.64e-77	TerTurn2	Teredinibacter turnerae	Bacteria;Proteobacteria;Gammaproteobacteria;Alteromonadales;Alteromonadalesgeneraincertaesedis;Teredinibacter	98.23	4.7e-79	nitrogenase reductase, partial [Vibrio natriegens NBRC 15636 = ATCC 14048 = DSM 759]	AAD55588.1	ATCGACCACAACTCAAAACCTTGTAGCGGCACTTGCTGAAGCGGGCAAGAAAGTAATGATCATCGGTTGTGACCCGAAAGCGGATTCAACTCGTTTGATCCTTCACTCAAAAGCGCAGAACACCATCATGGAAATGGCGGCTGAAGCGGGTACGGTTGAAGATATCGAACTAGAAGATGTACTAAAAGTCGGTTACGGCGATGTTCGCTGTGTTGAGTCAGGCGGCCCAGAGCCTGGTGTAGGTTGTGCAGGTCGTGGTGTAATCACAGCGATCAACTTCTTGGAAGAAGAGGGGGCATACGAAGAAGACCTAGACTTTGTTTTCTACGACGTACTGGGT	0	0	0	0	1	0	0	2118	0	0	0	0	0	0	0	0	0	0	0	0	0	0	0	0	0	995	0	0	0	0	0	0	0	0	0	0	0	0
OTU_19	1G	96.46	8.08e-77	TerTurn2	Teredinibacter turnerae	Bacteria;Proteobacteria;Gammaproteobacteria;Alteromonadales;Alteromonadalesgeneraincertaesedis;Teredinibacter	95.575	7.84e-78	nitrogenase reductase, partial [Vibrio natriegens NBRC 15636 = ATCC 14048 = DSM 759]	AAD55588.1	ATCGACAACCACTCAAAACTTGGTTGCTGCTCTAGCAGAAGCGGGCAAGAAGGTAATGATTGTAGGTTGTGACCCTAAAGCGGATTCAACTCGCCTTATCCTTCACTCTAAAGCTCAAAACACCATTATGGAAATGGCTGCTGAAGCTGGAACCGTTGAAGATCTAGAGTTAGAAGATGTACTTAAAGTAGGTTATGGCGATGTTCGCTGTGTTGAGTCTGGTGGTCCAGAGCCTGGTGTTGGTTGTGCAGGTCGCGGTGTAATTACAGCGATTAACTTCCTTGAAGAGGAAGGTGCCTATGAAGAAGAATTGGATTTTGTTTTCTATGACGTACTGGGT	0	0	547	0	0	24	244	0	0	0	0	0	0	0	0	0	0	0	0	0	0	2467	0	0	0	0	0	0	0	0	0	0	0	0	0	0	0	0
OTU_20	4G	42.609	1.71e-25	ClsGeno2	Clostridiales genomosp.	Bacteria;Firmicutes;Clostridia;Clostridiales;__f;__g	96.46	6.63e-77	chlorophyllide a reductase iron protein subunit X [Rhodospirillales bacterium 20-64-7]	OYV35318.1	GAGCTTCACCCTGGCCAACCTCTCCTACATGATGGCCCAGCAGGACAAGCGCGTCCTGCTGATCGGCTGCGATCCCAAGAGCGACACGACCTCGCTGCTGTTCGGCGGGCGCAGCTGCCCGACCATCATCGAAACCTCTTCGACCAAGAAGCTCGCCGGCGAGCAGGTGCAGATCGGCGACGTCTGCTTCAAGCGCGACGGCGTCTTCGCCATGGAGCTGGGCGGCCCGGAAGTGGGCCGTGGCTGCGGCGGGCGCGGCATCATCCACGGCTTCGAGCTTTTGGAGAAGCTCGGCTTCCACGACTGGGGCTTCGACTTCGTGCTCCTGGACTTCCTGGGC	0	0	0	0	0	0	0	0	0	0	0	0	0	0	0	0	0	0	0	0	0	0	0	0	0	0	0	0	0	0	0	0	0	0	0	0	0	0
OTU_21	2C	89.381	2.12e-73	OpiBact4	Opitutaceae bacterium	Bacteria;Verrucomicrobia;Opitutae;Opitutales;Opitutaceae;__g	94.69	8.64e-79	nitrogenase iron protein, partial [Clostridium sp. Kas107-2]	BAF35986.1	ATCTACAACACAGCAGAATACTGCTGCAGCTATGGCACATTTTTATGATCAGAAGATCTTTATTCATGGATGTGACCCAAAGGCTGACTCTACCCGTCTCATCCTGGGCGGGAAGCCTCAGGAAACCCTGATGGATGTGTTAAGAGAAGAAGGCGCTGAAAAGGTTACGAATGAAAAGGTTATCAAGACCGGCTACCGTGATATCCGCTGTGTTGAGTCCGGCGGTCCTGAACCAGGGGTAGGATGTGCGGGCAGAGGTGTTATCACCGCCATTGATCTGATGGAAACCAATGGTGCCTATACCGATGATTTAGACTTTGTCTTCTATGATGTACTAGGC	0	0	0	0	0	0	0	0	0	0	0	0	0	0	0	0	0	0	0	0	0	0	0	0	0	0	0	0	0	0	0	0	0	0	0	0	0	0
OTU_22	1G	98.23	4.99e-78	PseStut3	Pseudomonas stutzeri	Bacteria;Proteobacteria;Gammaproteobacteria;Pseudomonadales;Pseudomonadaceae;Pseudomonas	100	1.21e-79	dinitrogenase reductase, partial [unidentified nitrogen-fixing bacteria]	AAF60992.1	GTCGACCACTACCCAGAACCTGGTTGCCGGCCTCGCCGAGCTGGGGAAGAAGGTCATGATCGTGGGCTGTGACCCCAAAGCCGACTCCACCCGTTTGATTCTGCATTCCAAGGCGCAGAACACCATCATGGAAATGGCTGCTGAGGCAGGCACCGTCGAAGACCTTGAGCTCGAAGACGTGCTGAAGACCGGCTACGGCGACATCAAGTGTGTTGAGTCGGGTGGTCCTGAGCCGGGTGTTGGTTGCGCCGGTCGTGGTGTTATCACCGCGATTAACTTCCTGGAAGAGGAAGGCGCCTACGAAGAAGACCTCGACTTCGTGTTCTACGACGTGCTGGGT	0	0	1	0	0	0	0	0	0	0	0	0	0	0	0	0	0	0	0	0	0	1011	0	2611	0	0	0	0	0	0	0	0	0	0	0	0	0	0
OTU_23	1G	95.575	9.83e-77	TerTurn2	Teredinibacter turnerae	Bacteria;Proteobacteria;Gammaproteobacteria;Alteromonadales;Alteromonadalesgeneraincertaesedis;Teredinibacter	94.69	1.26e-77	nitrogenase reductase, partial [Vibrio natriegens NBRC 15636 = ATCC 14048 = DSM 759]	AAD55588.1	GTCTACCACTACCCAAAACTTGGTTGCGGCTTTAGCAGAAGCTGGCAAAAGTGTAATGATTGTTGGTTGTGACCCAAAAGCTGACTCTACTCGTTTGATTCTTCACTCTAAAGCTCAAAACACCATCATGGAGATGGCTGCTGAAGCTGGTACGGTTGAAGATCTAGAACTTGAAGACGTTCTTAAAGTTGGCTACGGCGACATCCGTTGTGTTGAGTCTGGTGGTCCAGAGCCTGGCGTTGGTTGTGCTGGCCGTGGTGTTATCACTGCGATCAACTTCTTGGAAGAAGAAGGTGCTTACGACGACGACCTAGACTTCGTATTCTACGATGTATTGGGT	0	0	9	0	0	0	0	0	0	0	0	1	0	3659	0	0	0	0	0	0	0	0	0	0	0	1	0	0	0	0	0	0	0	0	0	0	0	0
OTU_24	4G	46.491	1.6e-28	CloLjun5	Clostridium ljungdahlii	Bacteria;Firmicutes;Clostridia;Clostridiales;Clostridiaceae;Clostridium	96.46	4.51e-77	chlorophyllide reductase iron protein subunit X [Oceanibaculum indicum P24]	EKE76065.1	GAGCTTTACCCTGGCGAACCTCTCCTACATGCTTGCGCAGCTTGGCAAAAAGGTTCTCCTGATCGGTTGTGATCCGAAAAGCGACACCACCTCGCTCCTGTTCGGAGGACGGGCCTGCCCCACCATCATCCAGACCGCATCGAGCCGCAAGGAAGCCGGCGCGGAGGTCGCAATTTCAGACGTCTGTTTCAAACGGGACGGCGTCTTCGCGATGGAACTTGGGGGCCCTGAAGTCGGGCGCGGCTGCGGTGGACGCGGTATCATTCACGGGTTCGAAACGCTCGAGAAACTCGGCTTTCATGACTGGGATTTCGACTATGTCCTGCTGGACTTCCTCGGC	0	0	1	0	0	0	0	0	0	0	0	0	0	0	0	0	0	0	0	0	0	37	0	0	0	0	0	0	0	0	0	0	0	0	0	0	0	0
OTU_25	4G	46.491	1.44e-29	CloLjun5	Clostridium ljungdahlii	Bacteria;Firmicutes;Clostridia;Clostridiales;Clostridiaceae;Clostridium	100	4.7e-80	chlorophyllide reductase iron protein subunit bchX [Rhodobacteraceae bacterium HLUCCO18]	KPQ18309.1	ATCGTTCACGCTCGCCAATCTCAGCCATATGATGGCCGAACAGGGCAAACGCGTGCTTTTAATTGGCTGCGATCCGAAATCCGATACGACCTCCCTTCTCTTTGGTGGCAAAGCCTGCCCGACGATTATCGAAACCTCCACCCAGAAGAAGCTCGCTGGGGAAGAGGTGAAAATCGGCGACGTTTGTTTCAAACGTGGTGGTGTTTTCGCAATGGAGTTGGGCGGGCCCGAGGTTGGCCGTGGCTGTGGCGGACGTGGAATTATCCATGGCTTCGAGCTTCTGGAAAAGTTGGGCTTTCACGATTGGGATTTCGACTATGTTCTGCTTGATTTCCTAGGC	0	0	0	0	1	0	0	3390	0	0	0	0	0	0	0	0	0	0	0	0	0	0	0	0	0	0	0	0	0	0	0	0	0	0	0	0	0	0
OTU_26	4D	46.491	6.32e-29	MrvForm2	Marvinbryantia formatexigens	Bacteria;Firmicutes;Clostridia;Clostridiales;Lachnospiraceae;Marvinbryantia	98.23	3.07e-78	chlorophyllide a reductase iron protein subunit X [Betaproteobacteria bacterium]	NBU58835.1	GAGCTTCACGCTCGCCAACCTCAGCTACATGATGGCCCAGCAGGGCAAGAAGGTCCTGCTCATCGGTTGCGATCCGAAGAGCGACACGACTTCGCTGCTGTTCGGCGGGAAGGCGACGCCGACCATCATTGAAACCTCCTCGAAGAAGAAGCTCGCCGGCGAAGAAGTCACCATCAGCGACGTCTGCTTCAAGCGCGACGGCGTGTTCGCCATGGAGCTCGGCGGCCCGGAAGTCGGCCGCGGCTGCGGCGGCCGCGGCATCATCCACGGCTTCGAGACGCTGGAGAAGCTCGGCTTCCACGAATGGGGCTTCGACTACGTGCTGCTCGACTTCCTCGGC	0	0	0	0	22	0	0	0	0	0	0	0	0	0	0	0	0	0	0	0	0	0	0	0	0	0	0	3	0	0	0	0	0	2834	0	0	0	104
OTU_27	4G	42.982	3.06e-26	CloLjun5	Clostridium ljungdahlii	Bacteria;Firmicutes;Clostridia;Clostridiales;Clostridiaceae;Clostridium	92.92	1.82e-74	BchX [Rhodobacter sphaeroides]	AAF24297.1	GAGCTTCACGCTCGCAAATCTCTCTTACATGATGGCCCAACAGGGACAGAGAGTGCTGCTGATAGGATGCGATCCGAAGAGCGACACCACGTCGCTGTTGTTCGGCGGACGCGCATGCCCGACGATCATCGAGACCTCGGCCAGAAAGAAACTGGTGGGCGAGCAGGTGAACATCGGCGATGTGTGCTTCAAACGCGACGGTGTGTTCGCCATGGAGCTGGGAGGGCCCGAAGTAGGGCGGGGCTGCGGCGGCCGCGGCATCATTCATGGATTTGAGCTCCTCGAGAAGCTCGGCTTTCACGACTGGGGCTTTGACTACGTGCTGCTGGATTTCCTGGGC	0	0	0	0	0	0	0	0	0	0	0	0	0	0	0	0	0	0	0	0	0	0	0	0	5276	0	0	0	0	0	0	0	0	0	0	0	0	0
OTU_28	4G	44.737	2.76e-28	MrvForm2	Marvinbryantia formatexigens	Bacteria;Firmicutes;Clostridia;Clostridiales;Lachnospiraceae;Marvinbryantia	91.15	5.97e-74	BchX [Rhodobacter sphaeroides]	AAF24297.1	GAGCTTCACGCTTTCGAACCTGTCTTACATGATGGCCCAGCAGGGCAAGAAGGTATTGTTGATCGGCTGCGATCCCAAGAGCGACACGACGTCGCTGCTTTTCGGCGGCAAGAGCTGCCCGACAATTATCGAAACCTCGTCGAAGAAAAAGGCTGCTGGCGAAGAAGTTGAGATCGGCGACGTCTGTTTCAAACGGGACGGCGTTTTCGCCATGGAACTCGGCGGCCCGGAAGTCGGTCGTGGCTGCGGCGGGCGCGGAATCATTCACGGCTTCGAATTGCTCGAGAAGCTCGGTTTTCACGAGTGGGATTTCGACTACGTATTGCTCGACTTCCTCGGT	0	0	0	2399	0	0	0	0	0	0	0	0	0	0	0	0	0	0	0	0	0	0	0	0	0	0	0	0	0	0	0	0	0	0	0	0	0	0
OTU_29	4I	49.558	1.02e-33	FusNucl2	Fusobacterium nucleatum	Bacteria;Fusobacteria;__c;Fusobacterales;Fusobacteriaceae;Fusobacterium	100	2.73e-80	protochlorophyllide reductase iron protein subunit (chloroplast) [Ostreobium sp. HV05007bc]	ARO74425.1	AATCGACAATGAGTTGTAATATTTCAATTGCTTTTGCAAGACGTGGAAAAAAAGTTTTACAAATTGGTTGCGATCCAAAACACGATAGTACTTTTACATTAACAGGTTTTTTAATTCCAACAATTATTGATACGTTACAGGCAAAAGATTATCATTATGAAGATGTTTGGCCAGAAGATGTAATTTATAAGGGATATAGTGGAGTAGATTGTGTAGAAGCCGGAGGTCCTCCTGCTGGTGCTGGTTGTGGAGGATATGTTGTAGGAGAAACAGTAAAACTTTTGAAAGAATTAAATGCATTTTATGAATATGATGTTATTCTTTTTGATGTTTTAGGT	325	49	899	30651	13710	2348	16	50367	5236	28673	36964	111057	31939	71	164038	137138	141392	1	162047	3	32	12	135663	45249	3734	4	14	80	145178	4	9416	177386	11	70939	100	116912	14	18436
OTU_30	4I	49.558	1.02e-33	FusNucl2	Fusobacterium nucleatum	Bacteria;Fusobacteria;__c;Fusobacterales;Fusobacteriaceae;Fusobacterium	100	2.73e-80	protochlorophyllide reductase iron protein subunit (chloroplast) [Ostreobium sp. HV05007bc]	ARO74425.1	ATCTACTATGAGTTGCAATATTTCGATAGCATTCGCTAGGCGAGGGAAGAAAGTTCTACAAATAGGTTGTGACCCAAAACATGATAGTACTTTTACACTAACGGGGTTTCTAATTCCCACTATTATAGATACTTTGCAGGCCAAAGATTACCATTACGAGGATGTTTGGCCAGAGGATGTGATTTATAAAGGCTATAGTGGCGTTGATTGTGTAGAAGCTGGTGGACCACCAGCTGGGGCTGGATGTGGTGGATATGTCGTTGGAGAGACCGTTAAATTATTAAAAGAACTTAATGCTTTTTATGAGTATGATGTGATACTTTTTGATGTCTTAGGAG	68	108	70	5080	1409	101	608	8604	292	9196	3	441	406	118685	1	3	6350	6	0	2	6	98147	34888	3713	0	2	0	137439	1	147464	2	9	210750	1	41752	8104	14283	70197
OTU_31	1B	91.071	1.33e-72	OscSpec5	Oscillatoria sp.	Bacteria;Cyanobacteria;__c;Oscillatoriales;__f;Oscillatoria	92.857	4.8e-73	nitrogenase iron protein [Leptolyngbyaceae cyanobacterium RM1_406_9]	NJO72596.1	ATCTACTACTTCTCAAAACACTATCGCTGCTTTAGCAGAGTTAGGTCAGAGAATTATGATTGTTGGTTGCGATCCCAAAGCTGACTCTACCCGCTTAATGCTTCACTGTAAAGCTCAAACTACAATTCTGCACTTAGCAGCAGAAAGAGGTGCAGTAGAAGATTTAGAACTAGAAGAAGTCTTGCTCCAGGGATATAAAGACGTTCTCTGTGTTGAGTCCGGCGGTCCCGAACCAGGTGTAGGTTGTGCAGGTCGCGGGATCATCACAGCTATCAACTTCTTAGAAGAAGAAGGTGCTTACGAAGATCTAGATTTCGTATCCTACGACGTACTAGGT	1	0	0	0	0	1	0	0	0	0	1	0	0	0	0	3	0	4	0	57052	169	0	0	82696	0	24113	0	1	0	880	1	1	2	0	0	1	35602	0
OTU_32	4I	49.558	1.02e-33	FusNucl2	Fusobacterium nucleatum	Bacteria;Fusobacteria;__c;Fusobacterales;Fusobacteriaceae;Fusobacterium	100	2.73e-80	protochlorophyllide reductase iron protein subunit (chloroplast) [Ostreobium sp. HV05007bc]	ARO74425.1	ATCTACGATGAGTTGTAATATTTCCATTGCATTCGCTAGGCGGGGAAAAAAAGTTTTACAAATAGGCTGCGATCCAAAACACGATAGCACATTTACGTTAACAGGGTTTTTAATCCCGACAATTATAGATACATTACAAGCCAAAGATTATCATTATGAAGACGTTTGGCCAGAGGATGTTATTTACAAAGGTTATAGCGGCGTCGATTGTGTAGAAGCTGGTGGACCACCAGCTGGAGCTGGTTGTGGTGGATATGTTGTTGGAGAAACTGTAAAGCTATTAAAAGAACTTAATGCATTCTATGAGTATGATGTAATACTTTTTGATGTTTTAGGA	0	0	0	1	0	0	0	0	0	4	0	0	2	0	0	0	0	0	1	0	0	1	0	0	2	2	82783	1	27	342	73112	42081	2	2	0	3	3	1
OTU_33	4I	50.442	1.89e-33	FusNucl2	Fusobacterium nucleatum	Bacteria;Fusobacteria;__c;Fusobacterales;Fusobacteriaceae;Fusobacterium	98.214	7.33e-80	Protochlorophyllide reductase iron protein subunit (chloroplast) [Halimeda micronesica]	AYC64006.1	ATCAACAATAAGTTGCAATCTCTCCATAGCATTAGCTCGACGAGGACAAAAGGTTTTACAAATTGGTTGTGATCCAAAACATGATAGTACTTTTACTTTAACAAATTTTTTAATACCAACGATCATTGATACTTTACAAGCGAAAGATTATCATTATGAAGATGTTTGGCCCGAAGATGTTATATACAAAGGATACAGTGGTGTTTCTTGTGTGGAGGCGGGTGGTCCTCCCGCTGGAGCTGGATGTGGTGGTTATGTTGTAGGTGAAACAGTCAAACTTTTAAAAGAATTAAATGCATTTTATGAATATGACGTTATTATTTTTGATGTTTTAGGC	283	0	0	3282	0	1954	1	5	6	77178	208	3	25423	3	3	0	0	0	0	0	0	0	0	0	0	0	0	0	0	0	0	0	0	0	0	0	0	0
OTU_34	4I	49.558	1.02e-33	FusNucl2	Fusobacterium nucleatum	Bacteria;Fusobacteria;__c;Fusobacterales;Fusobacteriaceae;Fusobacterium	100	2.73e-80	protochlorophyllide reductase iron protein subunit (chloroplast) [Ostreobium sp. HV05007bc]	ARO74425.1	ATCGACTATGAGTTGCAATATTTCAATTGCATTCGCCAGGAGAGGGAAAAAGGTTTTACAAATTGGCTGTGACCCAAAGCATGATAGTACATTTACATTAACAGGGTTTCTAATTCCTACAATTATAGACACTTTACAAGCAAAAGATTACCATTACGAAGACGTCTGGCCGGAAGATGTTATTTATAAAGGTTATAGTGGCGTTGATTGTGTAGAAGCTGGTGGCCCCCCGGCCGGTGCAGGATGTGGTGGATATGTTGTTGGAGAAACTGTTAAATTATTAAAAGAGCTTAATGCTTTTTATGAATATGATGTTATATTATTCGATGTCTTAGGT	13508	1863	27236	52548	9808	3263	2502	64	826	1336	0	71	567	0	0	0	0	1	0	0	0	0	0	30	0	185	0	0	0	0	1	0	0	2	0	393	0	0
OTU_35	4I	49.558	1.02e-33	FusNucl2	Fusobacterium nucleatum	Bacteria;Fusobacteria;__c;Fusobacterales;Fusobacteriaceae;Fusobacterium	100	2.73e-80	protochlorophyllide reductase iron protein subunit (chloroplast) [Ostreobium sp. HV05007bc]	ARO74425.1	ATCAACAATGAGTTGCAATATTTCAATTGCATTTGCTAGACGAGGAAAAAAAGTTTTACAAATAGGTTGCGACCCTAAACACGATAGCACATTCACATTAACGGGGTTTCTAATTCCTACAATTATAGATACTTTGCAAGCTAAAGACTATCATTACGAAGATGTTTGGCCGGAAGATGTTATTTATAAAGGCTATAGTGGTGTTGATTGTGTAGAAGCTGGAGGACCACCAGCTGGTGCCGGATGTGGAGGATATGTTGTAGGAGAAACTGTTAAATTATTAAAAGAACTTAACGCTTTTTATGAATATGACGTAATACTTTTTGACGTTTTAGGG	0	9655	3404	1	59275	154	16	0	4	0	0	0	3406	0	0	0	0	0	0	0	0	0	0	0	0	0	4234	0	0	0	0	0	0	0	0	2	0	0
OTU_36	4I	49.558	1e-33	FusNucl2	Fusobacterium nucleatum	Bacteria;Fusobacteria;__c;Fusobacterales;Fusobacteriaceae;Fusobacterium	99.107	1.45e-79	protochlorophyllide reductase iron protein subunit (chloroplast) [Ostreobium sp. HV05007bc]	ARO74425.1	ATCGACAATGAGTTGCAATATTTCAATTGCATTTGCTAGAAGAGGGAAAAAAGTTTTACAAATAGGTTGTGACCCCAAACACGATAGTACATTTACCTTGGCAGGATTTTTAATACCTACAATTATCGATACTTTACAGGCTAAAGATTACCACTATGAAGACGTTTGGCCAGAAGATGTTATTTATAAAGGATATAGTGGCGTTGATTGCGTAGAAGCAGGAGGTCCACCAGCAGGTGCTGGGTGTGGTGGGTACGTTGTTGGAGAAACGGTCAAATTATTAAAAGAACTAAATGCCTTTTATGAATATGACGTAATACTTTTTGATGTTTTAGGG	0	0	0	0	0	2	1	1	22453	3194	114	12556	17531	55	2543	0	0	0	0	0	0	0	0	0	0	0	0	0	0	0	0	0	0	0	0	0	0	0
OTU_37	4I	49.558	4.25e-33	FusNucl2	Fusobacterium nucleatum	Bacteria;Fusobacteria;__c;Fusobacterales;Fusobacteriaceae;Fusobacterium	96.429	9.09e-82	photochlorophyllide reductase subunit L (chloroplast) [Caulerpa filiformis]	ACM51413.1	GTCAACGATTAGTTGCAATCTCTCAATAGCTTTAGCAAGACGTGGACAAAAGGTTTTACAAATTGGTTGTGATCCAAAACATGATAGTACTTTTACTTTAACAAGTTTTTTAATACCAACAATTATTGATACTTTACAAGCTAAAGATTATCATTATGAAGATGTTTGGCCTGAAGACGTTATATATAAAGGATACGGAGGTGTTTCTTGTGTAGAAGCAGGGGGGCCTCCTGCAGGAGCTGGATGTGGTGGTTATGTTGTTGGTGAAACAGTTAAACTTTTGAAGGAGTTAAATGCGTTCTATGAGTATGATGTTATTCTTTTTGATGTTTTGGGT	0	729	50	506	303	9	5907	0	19114	1222	0	0	469	2	0	0	0	0	0	0	0	0	0	0	0	0	0	0	0	1	0	0	0	0	0	0	0	0
OTU_38	4I	51.304	6.07e-35	FusUlcer	Fusobacterium ulcerans	Bacteria;Fusobacteria;__c;Fusobacteriales;Fusobacteriaceae;Fusobacterium	91.964	4.27e-62	ferredoxin:protochlorophyllide reductase (ATP-dependent) iron-sulfur ATP-binding protein, partial [Cyanobacteria bacterium]	RYY00113.1	ATCAACAACAAGCTGCAATATTTCAATTGCGCTTTCTGTACGCGGAAAAAATGTATTACAAATTGGTTGTGATCCTAAACATGATAGTACGTTTACATTAACAGGATTTTTAATACCGACAATAATTGATACGTTACATGAGAAAGATTATCATTATGAAGATGTTTGGCCAGATGATGTTATCTACAATGGATTTGGAGGCGTTCATTGTGTTGAAGCTGGCGGCCCTCCGGCGGGAGCCGGGTGTGGAGGTTATGTTGTTGGGGAAACTGTTAAATTATTAAAAGAGTTAAACGCTTTTTATGAATATGATGTGATTTTGTTTGATGTATTAGGT	0	3245	13	1	1	0	10	0	0	0	709	0	0	0	0	0	1392	0	1	0	0	0	0	0	48933	1	1	0	1	0	1	667	0	1	0	0	0	0
OTU_39	4I	52.212	9.83e-34	FusSpec4	Fusobacterium sp.	Bacteria;Fusobacteria;__c;Fusobacteriales;Fusobacteriaceae;Fusobacterium	100	2.15e-79	ferredoxin:protochlorophyllide reductase (ATP-dependent) iron-sulfur ATP-binding protein [Prochlorococcus sp. MED105]	MAK08117.1	ATCAACTACATCATCAAACCTTTCTGCAGCATTCTCAAAATTAGGTAAAAAGGTTCTACAAATTGGATGTGATCCGAAACACGATAGCACTTTCACTTTGACGCACAAAATGGTTCCTACAGTTATCGATATTCTCGAAGAGGTTGATTTTCATAGCGAAGAATTGAGGCCAACCGATTTCATGTTTGAAGGTTTTAATGGCGTAATGTGCGTTGAAAGTGGCGGTCCTCCTGCTGGGACAGGGTGCGGGGGATATGTAACCGGTCAGACAGTTAAACTATTAAAAGAACATCACTTATTAGAAGATACTGACGTTGTTATTTTTGACGTCCTAGGA	408	1607	0	0	0	0	0	0	0	0	0	0	0	0	0	0	0	0	4713	0	7084	0	0	0	2	2	2	750	1	0	4636	0	0	110232	4379	0	0	31256
OTU_40	4I	50.442	8.47e-34	FusNucl2	Fusobacterium nucleatum	Bacteria;Fusobacteria;__c;Fusobacterales;Fusobacteriaceae;Fusobacterium	100	2.39e-80	protochlorophyllide reductase iron proteinsubunit (chloroplast) [Ostreobium sp. HV05042]	ARQ82247.1	ATCAACAATGAGTTGTAATATATCTATAGCTTTTGCGAGACGAGGAAAAAAAGTTCTACAAATAGGATGTGATCCAAAACATGATAGTACGTTTACATTAACAGGGTTTTTAATTCCAACAATTATTGATACATTACAATCAAAAGATTATCATTATGAAGATGTTTGGCCTGAAGATATTATATATAAAGGTTATAGTGGAGTAGACTGTGTCGAAGCAGGTGGGCCACCTGCTGGAGCAGGTTGTGGAGGATATGTTGTAGGAGAAACTGTTAAGTTATTAAAAGAGCTTAATGCTTTTTATGAATACGATGTTATTTTATTTGATGTTTTAGGT	12	0	0	4	0	0	0	0	0	0	0	0	0	0	0	0	0	0	0	0	0	0	0	0	0	0	0	0	0	0	0	0	0	0	0	1	35943	1
OTU_41	4I	51.304	7.76e-33	TurSang2	Turicibacter sanguinis	Bacteria;Firmicutes;Erysipelotrichi;Erysipelotrichales;Erysipelotrichaceae;Turicibacter	97.321	1.46e-78	protochlorophyllide oxidoreductase [beta proteobacterium AAP99]	KPF69245.1	GAGCACGACGTCGTCGAACCTGTCGGTGGCGTTCTCCAAGCTCGGCAAGCGCGTGCTGCAGATTGGCTGCGATCCCAAGCACGACTCGACCTTCACGTTGACCAAGCAACTGATGCCGACCGTGATCGACGTTCTCGAGTCGGTGAACTTCCACTCCGAGGAACTACGCCCCGAAGACTTCGTGTTCGAAGGCTACAACGGCGTGATGTGCGTCGAGGCCGGCGGTCCGCCGGCTGGTACCGGTTGCGGCGGATACGTCGTCGGTCAGACCGTGAAGCTCCTCAAGGAACATCATCTGCTCGAGGACACCGACGTGGTGATCTTCGACGTGCTCGGC	2	0	0	497	12	3	0	89	28	65	3	696	0	4	798	157	172	0	0	2144	290	1	4	122	11004	56	93	317	1	75	1143	28	425	252	1	4	605	480
OTU_42	1J	96.429	4.96e-75	ZymMobi4	Zymomonas mobilis	Bacteria;Proteobacteria;Alphaproteobacteria;Sphingomonadales;Sphingomonadaceae;Zymomonas	98.214	1.66e-77	nitrogenase iron protein [Rhodobacteraceae bacterium]	MBB93981.1	GTCGACCACCTCGCAAAACACCCTCGCGGCCCTGGTCGAACTGGGCCAGAAGATTCTCATCGTCGGCTGTGACCCCAAGGCTGACTCGACCCGACTGATCCTGAACTCCAAGGCCCAGGACACCGTGCTGCACCTGGCCGCCGAAATGGGCTCTGTCGAGGATCTCGAGCTCGAGGACGTGCTCAAGATCGGCTACCAGGACATCAAGTGCGTCGAGTCCGGCGGTCCCGAGCCCGGGGTTGGCTGCGCCGGCCGCGGCGTGATCACCTCCATCAACTTCCTGGAAGAAAACGGCGCCTATGACGATGTCGACTACGTCTCTTATGACGTTCTCGGT	22643	0	0	0	0	0	0	0	0	0	1	0	0	0	0	0	0	0	0	0	0	0	0	0	0	0	0	0	0	0	0	0	0	0	0	0	0	0
OTU_43	4I	51.304	2.13e-32	FusUlcer	Fusobacterium ulcerans	Bacteria;Fusobacteria;__c;Fusobacteriales;Fusobacteriaceae;Fusobacterium	94.643	1.04e-65	Protochlorophyllide reductase iron protein subunit (chloroplast) [Halimeda micronesica]	AYC64006.1	ATCAACAATAAGTTGTAACATTTCAATTGCATTAGCTCGACGAGGAAAAAAAGTTTTACAAATTGGATGTGACCCAAAGCATGACAGTACCTTTACTTTAACTAATTTTTTAATTCCTACAATTATTGATACTTTACAAGTTAAAGACTATCATTATGAGGATGTTTGGCCAGAGGATGTTATATATGAGGGATATAGTGGTGTCAATTGCGTTGAAGCAGGAGGACCTCCTGCTGGAGCAGGTTGTGGTGGTTATGTTGTTGGTGAAACCGTTAAATTATTAAAAGAATTAAATGCATTTTATGAATATGACATTGTATTATTTGATGTTCTCGGC	0	0	0	0	0	0	0	0	554	0	1619	0	1068	0	0	0	0	0	0	0	0	0	0	0	0	0	0	0	0	0	0	0	0	0	0	0	0	0
OTU_44	4I	59.292	1.23e-40	FusNucl2	Fusobacterium nucleatum	Bacteria;Fusobacteria;__c;Fusobacterales;Fusobacteriaceae;Fusobacterium	100	1.51e-80	ChlL (apicoplast) [Apicomplexa sp. WK-2018_Corallicola]	AXP85355.1	ATCTACTATTAGTTCTAATCTTTCAGCCGCGTTCTCAAAAAGGGGCAAACGTGTTTTACAAATAGGGTGCGACCCTAAGCATGATAGTACGTATACACTAACAGGAACATTGATCCCTACTATTATTGATACCTTACAAGAAAAAGATTATCATTATGAAAATATTTGGTATGAAGATATTATTTATAAGGGCTATAATGGAGTAGATTGTGTAGAAGCAGGGGGCCCTCCTGCAGGAACAGGATGTGGGGGGTATGTTGTTGGAGAAACGGTTAAACTTTTACGCGAATTAAATGCATTTGATGAGTACGATGTTATTATCTTTGATGTCTTAGGG	0	1	0	0	15	4	1	58	1	2928	2	91	83	72	58	25	389	0	304	695	57	5	7470	44	234	99	79	1	12	331	20	6	0	8506	1067	1613	6231	596
OTU_45	4I	49.558	6.73e-33	FusNucl2	Fusobacterium nucleatum	Bacteria;Fusobacteria;__c;Fusobacterales;Fusobacteriaceae;Fusobacterium	91.964	4.81e-65	ATP-binding subunit of protochlorophyllide reductase (chloroplast) [Pseudochloris wilhelmii]	YP_009106735.1	ATCAACGATAAGTTGTAATTTATCAATTGCATTTGCACGACGTGGACGAAAAGTCTTGCAAATTGGATGTGATCCGAAACATGATAGTACTTTTACACTTACTGGTTTCTTAATTCCTACTATTATTGATACTCTTCAAAATAAAGATTACCATTATGAAGATATTTGGCCAGAAGATGTGATTTATCAAGGTTATTCACATGTTGATTGTGTTGAGGCGGGCGGTCCACCCGCCGGTGCTGGTTGTGGCGGTTATGTAGTAGGTGAAACAGTTAAGTTATTGAAGGAATTAAACGCTTTTTATGAATATGATATTATATTATTTGATGTTCTAGGT	0	0	0	0	0	0	509	0	9258	9103	0	0	0	0	0	0	0	0	0	0	0	0	0	0	0	0	0	0	0	0	0	0	0	0	0	0	0	0
OTU_46	1J	92.857	1.29e-73	RhbSpec3	Rhodobacter sp.	Bacteria;Proteobacteria;Alphaproteobacteria;Rhodobacterales;Rhodobacteraceae;Rhodobacter	96.429	2.77e-76	nitrogenase iron protein [Rhodobacteraceae bacterium]	MBB93981.1	GTCGACCACCTCACAGAACACGCTGGCTGCCCTCGTGGAACTTGGCCAGAAAATCCTCATCGTCGGCTGCGACCCCAAGGCCGACTCGACCCGCCTGATCCTCAACTCCAAGGCGCAGGACACCGTTCTGCACATGGCCGCAGAGATGGGATCGGTCGAAGACCTCGAGCTCGAGGACGTGCTCAAGGTCGGCTACCAGGACATCAAATGCGTCGAGTCCGGTGGCCCGGAGCCGGGGGTTGGCTGCGCCGGCCGCGGCGTGATCACCGCCATCAACTTCCTCGAGGAAAACGGCGCCTATGAAGACGTGGACTATGTGTCCTACGACGTTCTGGGC	0	0	0	0	0	0	0	0	0	0	0	0	0	0	0	0	0	0	0	0	0	0	0	0	0	0	0	0	0	119	4311	431	0	4013	2935	916	1786	0
OTU_47	1J	95.536	1.4e-74	ZymMobi4	Zymomonas mobilis	Bacteria;Proteobacteria;Alphaproteobacteria;Sphingomonadales;Sphingomonadaceae;Zymomonas	98.214	1.79e-77	nitrogenase iron protein [Rhodobacteraceae bacterium]	MBB93981.1	ATCCACGACCTCCCAGAACACCTTGGCCGCTCTGGTCGAGATGGGACAGAAGATCCTGATCGTGGGCTGTGACCCCAAGGCGGATTCCACCCGCCTGATCCTGAACTCCAAGGCACAGGACACCGTGCTGCACCTCGCCGCCGAAATGGGCTCGGTCGAGGATCTGGAGCTCGAGGATGTCCTCAAGATCGGCTACGAGGACATCAAATGCGTCGAATCCGGCGGCCCCGAGCCGGGCGTCGGCTGCGCGGGCCGGGGTGTGATCACCTCGATCAACTTCCTGGAAGAAAACGGTGCCTATGACGATGTCGACTACGTCTCGTACGACGTGTTGGGC	16851	0	0	0	0	0	0	0	0	0	0	0	0	0	0	0	0	0	0	0	0	0	0	0	0	0	0	0	0	0	0	0	0	0	0	0	0	0
OTU_48	4I	50.442	7.53e-34	FusNucl2	Fusobacterium nucleatum	Bacteria;Fusobacteria;__c;Fusobacterales;Fusobacteriaceae;Fusobacterium	99.107	4.57e-80	protochlorophyllide reductase iron protein subunit (chloroplast) [Ostreobium sp. HV05007bc]	ARO74425.1	ATCAACAATGAGCTGTAATATTTCTATTGCTTTTGCAAGACGTGGAAAAAAAGTTTTACAGATCGGTTGTGATCCAAAACACGATAGCACTTTTACATTAACAGGGTTTTTAATTCCTACCATTATAGATACATTACAAGCTAAAGATTATCACTATGAGGACGTATGGCCGGAAGATATAATTTACAAAGGATATAGTGGAGTAGATTGCGTCGAAGCAGGTGGTCCACCTGCTGGAGCTGGTTGTGGAGGATATGTTGTTGGTGAAACAGTAAAATTATTAAAAGAATTAAACGCATTTTATGAATATGATGTTATTCTATTTGATGTTTTGGGG	0	4	1	45	9735	3391	113	0	229	4094	786	34	0	1	1	0	0	0	0	0	0	0	0	0	0	0	0	0	0	0	0	0	0	0	0	0	0	0
OTU_49	4I	49.558	9.17e-33	FusNucl2	Fusobacterium nucleatum	Bacteria;Fusobacteria;__c;Fusobacterales;Fusobacteriaceae;Fusobacterium	91.071	6.78e-66	ATP-binding subunit of protochlorophyllide reductase (chloroplast) [Pseudochloris wilhelmii]	YP_009106735.1	ATCGACAATCAGTTGTAATTTGTCTATAGCATTAGCTCGTCGAGGAAAAAAAATATTACAAATAGGGTGTGACCCAAAGCATGATAGCACATTTACTCTAACCGGATTTTTAATACCGACAATCATTGATACGCTTCAATCTAAAGATTATCATTATGAAGATATTTGGCCTGAAGATATTATTTATACTGGTTATGGAAATGTGGATTGTGTGGAAGCCGGAGGCCCACCAGCAGGAGCTGGATGCGGAGGATATGTGGTAGGAGAAACGGTTAAACTTTTGAAAGAATTAAATGCTTTTTACGAATATGATGTCATTCTATTTGATGTGCTAGGT	0	1	0	0	0	111	0	0	0	4967	22	1	4387	0	1	0	0	0	0	0	12240	0	0	0	0	0	0	0	0	0	0	0	0	0	0	0	0	0
OTU_50	4I	51.304	3.09e-33	FusUlcer	Fusobacterium ulcerans	Bacteria;Fusobacteria;__c;Fusobacteriales;Fusobacteriaceae;Fusobacterium	97.321	5.89e-78	ATP-binding subunit of protochlorophyllide reductase (chloroplast) [Atractomorpha echinata]	AMN09212.1	ATCAACAACCAGTTGTAATATTTCTATCGCTCTTGCAAGACGTGGCAAAAAAGTTTTACAAATAGGTTGTGATCCTAAACATGATAGTACTTTTACATTAACAGGATTCCCTATTCCAACAATTATCGACACACTTCAATCAAAAGATTATCATTACGAAGATGTTTGGCCAGAAGATGTTATTTATAAAGGATATGGCCAAGTGGATTGCGTCGAAGCCGGCGGTCCGCCGGCTGGTGCAGGGTGTGGAGGTTATGTTGTCGGAGAAACTGTAAAATTATTAAAAGAATTAAATGCTTTTTATGAATACGATATAATTTTATTTGATGTATTAGGT	0	0	0	0	0	0	0	0	0	0	0	0	0	0	0	0	1	0	0	32724	1	0	0	0	0	0	0	0	0	0	0	0	0	0	0	0	0	0
OTU_51	4I	49.558	3.36e-33	FusNucl2	Fusobacterium nucleatum	Bacteria;Fusobacteria;__c;Fusobacterales;Fusobacteriaceae;Fusobacterium	96.429	2.17e-77	protochlorophyllide reductase iron protein subunit (chloroplast) [Bryopsis sp. HV04063]	YP_009472469.1	GTCAACTATTAGTTGCAATATATCAATTGCACTTGCTCGAAGAGGTAAAAAAGTTTTACAAATTGGTTGTGATCCGAAACATGATAGCACTTTTACTTTAACAAGTTTTTTAATACCCACAATTATTGATACCCTGCAAACAAAAGATTATCATTATGAAGATGTTTGGCCAGAAGATGTTATTTATAAAGGATACAGTGGAGTTGATTGTGTTGAAGCGGGAGGACCTCCTGCAGGCGCTGGATGTGGTGGATATGTAGTTGGAGAAACAGTAAAATTACTAAAAGAATTAAATGCTTTTTTCGAATATGATGTTATATTATTTGATGTTTTAGGA	6	18	1	12472	69	0	0	0	49	0	0	0	0	0	0	0	0	0	0	0	0	179	0	0	0	0	0	0	0	0	0	0	0	0	0	0	0	0
OTU_52	4I	49.565	1.08e-33	FusUlcer	Fusobacterium ulcerans	Bacteria;Fusobacteria;__c;Fusobacteriales;Fusobacteriaceae;Fusobacterium	97.321	1.09e-78	photochlorophyllide reductase subunit L (chloroplast) [Corallina officinalis]	QJF58277.1	GTCAACAACTAGCTGTAACATTTCAGTAGCTTTGTCTTTCAGAGGTAAAAAAGTTCTTCAAATTGGTTGTGATCCTAAGCATGATAGTACTTTTACCCTAACAGGCTTTTTGATACCAACAATTATAGATACTTTGCAAGCTAAAGACTATCATTATGAAGATGTATGGCCAGAAGATGTAATCTATAAGGGGTACGGTAATGTTGATTGTGTTGAAGCTGGAGGACCTCCTGCTGGTGCTGGTTGCGGTGGCTATGTTGTTGGTGAGACTGTTAAGCTGTTAAAAGAGTTAAATGCTTTTGATGAATATGATGTTATTCTGTTTGATGTATTAGGA	0	0	0	0	0	0	0	0	0	0	0	0	0	0	0	6941	0	0	0	0	0	0	0	0	0	0	0	0	0	0	0	0	0	0	0	0	0	0
OTU_53	4I	49.565	3.81e-34	FusUlcer	Fusobacterium ulcerans	Bacteria;Fusobacteria;__c;Fusobacteriales;Fusobacteriaceae;Fusobacterium	97.321	7.93e-79	photochlorophyllide reductase subunit L (chloroplast) [Corallina chilensis]	YP_009660546.1	ATCGACTACTAGTTGCAATATATCGGTCGCTTTATCTGTACGCGGCAAGAAAGTGTTACAAATTGGCTGCGATCCTAAGCATGATAGTACTTTTACTTTGACAGGCTTTTTAATTCCAACAATTATAGATACATTGCAGTCTAGAGATTACCACTATGAAGATGTGTGGCCAGAAGATGTAATATATAAGGGCTACGGAAATGTAGATTGTGTTGAGGCTGGTGGCCCACCTGCAGGCGCCGGCTGCGGCGGCTATGTGGTTGGTGAAACAGTAAAACTTCTTAAAGAATTAAATGCTTTTGATGAATATGATGTCATTTTATTTGATGTTTTAGGT	0	0	0	0	0	1	26378	0	1318	760	0	0	0	0	0	0	0	2	0	0	0	0	0	0	0	0	0	1	0	0	0	0	0	0	0	0	0	0
OTU_54	4I	53.043	4.6e-35	CanMeth2	Candidatus Methanoregula	Archaea;Euryarchaeota;Methanomicrobia;Methanomicrobiales;Generaincertaesedis;CandidatusMethanoregula	95.536	1.78e-76	protochlorophyllide oxidoreductase [beta proteobacterium AAP99]	KPF69245.1	GAGCACGACGTCCTCCAATCTTTCCGTCGCGTTTTCCAAGCTTGGCAAACGCGTCCTTCAGATCGGGTGCGACCCGAAGCATGATTCGACGTTTACGCTCACCAAGAAACTGATGCCGACGGTGATCGACGTTCTCGAGAGCGTCGAGTTTCACGCGGAGGAGCTCGAGCCCGACGACTTCGTGTACGAGGGCTACAATGGTGTCCTTTGCGTCGAAGCGGGCGGACCTCCGGCGGGAACCGGTTGTGGCGGATACGTGGTTGGCCAGACCGTCAAGCTTCTCAAGGAACATCACCTGCTCGAGGAGACCGACGTCGTGATTTTCGACGTCCTGGGG	0	0	0	0	0	0	0	0	0	0	0	0	0	0	0	0	0	0	0	0	0	43	317	0	0	0	0	0	0	0	0	0	0	0	0	0	5330	0
OTU_55	4I	50	6.92e-34	SelNoxi2	Selenomonas noxia	Bacteria;Firmicutes;Negativicutes;Selenomonadales;Veillonellaceae;Selenomonas	100	3.82e-79	ferredoxin:protochlorophyllide reductase (ATP-dependent) iron-sulfur ATP-binding protein [Methylobacterium sp. CG09_land_8_20_14_0_10_71_15]	PIU04088.1	GTCGACGACCTCGTCGAACCTGTCGGTGGCCTTCTCGAAGCTCGGCAAGCGCGTCCTCCAGATCGGCTGCGACCCGAAGCACGACTCGACCTTCACCCTGACGAAACGCCTCGCCCCGACCGTCATCGATGCCCTGGAGGCGGTGCAGTTCCACTCCGAGGAGCTGCGCGTCGAGGACTTCGTCGCCGAGGGCTACAACGGCGTGATGTGCGTCGAGGCCGGCGGGCCCCCGGCGGGCACCGGCTGCGGCGGCTACGTGGTCGGCCAGACGGTGAAGCTCCTCAAGGAGCATCACCTTCTGGAGGACACCGACGTGGTGATCTTCGACGTGCTCGGC	0	0	0	0	0	0	0	0	0	0	0	0	0	0	0	0	0	0	0	0	0	0	0	0	7	0	3	0	0	0	0	0	0	0	0	639	0	0
OTU_56	4G	53.097	2.94e-34	FusNucl2	Fusobacterium nucleatum	Bacteria;Fusobacteria;__c;Fusobacterales;Fusobacteriaceae;Fusobacterium	96.429	3.48e-77	TPA: ferredoxin:protochlorophyllide reductase (ATP-dependent) iron-sulfur ATP-binding protein [Rhodobacteraceae bacterium]	HAB37910.1	ATCGACAACCTCGTCAAACCTGTCGGCGGCGTTTTCGATGCTGGGCAAGCGGGTGCTGCAGATCGGCTGTGACCCAAAGCATGACAGCACGTTTACCTTGACCGGACAATTGCAACCCACGGTAATAGATATTCTGAAAGAGGTGGATTTCCATCCCGAAGAGCTGCGACCTGAAGACTTCGTGACCGAAGGCTTCAATGGTGTGCAATGTGTCGAGGCGGGCGGGCCGCCCGCAGGCACAGGATGTGGTGGCTATGTGGTCGGGCAGACAGTGAAACTGTTGAAACAACACCACTTGCTTGAAGAGACCGATGTGGTGATATTTGATGTGCTGGGC	0	0	0	0	0	0	0	0	0	0	0	0	0	0	0	0	0	0	0	0	0	0	0	0	0	0	0	0	0	0	0	0	0	0	0	0	0	11810
OTU_57	4I	50.442	7.53e-34	FusNucl2	Fusobacterium nucleatum	Bacteria;Fusobacteria;__c;Fusobacterales;Fusobacteriaceae;Fusobacterium	99.107	4.57e-80	protochlorophyllide reductase iron protein subunit (chloroplast) [Ostreobium sp. HV05007bc]	ARO74425.1	ATCAACTATGAGCTGTAATATTTCTATTGCTTTTGCGAGACGTGGAAAAAAAGTTTTACAAATTGGTTGTGATCCAAAACATGATAGTACTTTTACATTAACAGGGTTTTTAATTCCTACGATTATTGATACATTACAAGCAAAAGATTATCATTATGAGGATGTATGGCCAGAAGATATAATTTATAAAGGATATAGTGGAGTAGATTGCGTAGAAGCTGGTGGACCACCTGCTGGAGCTGGGTGTGGAGGCTATGTTGTAGGAGAGACAGTAAAGTTATTAAAAGAACTAAACGCTTTTTATGAATATGATGTTATCCTTTTTGATGTTTTAGGA	0	7	0	89	19	85	2	0	0	0	0	2	6	0	0	0	0	2	0	0	0	0	0	0	0	0	0	1	0	0	11584	0	0	0	0	0	36	0
OTU_58	4I	52.174	2.79e-34	FusUlcer	Fusobacterium ulcerans	Bacteria;Fusobacteria;__c;Fusobacteriales;Fusobacteriaceae;Fusobacterium	100	3.99e-79	ferredoxin:protochlorophyllide reductase (ATP-dependent) iron-sulfur ATP-binding protein [Burkholderiales bacterium]	RTL23720.1	GAGCACGACGTCGAGCAACCTGTCCGCCGCGTTTGCCAAGCTGGGCAAGCGGGTGCTGCAGATCGGCTGCGACCCCAAGCACGACTCCACCTTCACGCTGACCAAGAAGATGCTGCCGACGGTCATCGACGTGCTCGAGACCGTCAACTTCCACACCGAAGAGCTGCGGGTCGAGGACTTCGTGTTCGAGGGCTACAACGGCGTCATGTGCGTCGAGGCCGGCGGCCCGCCCGCCGGCACCGGCTGTGGCGGCTACGTGGTCGGTCAGACGGTCAAGCTGCTCAAGGAGCATCACCTGCTGGAAGACACCGATGTGGTGATCTTCGATGTGCTCGGT	26	0	0	1536	86	1	0	186	8	237	10	193	45	995	832	0	19	0	1089	151	1	0	5	4	3	280	10	56	5	6	208	142	14	161	36	1	141	15
OTU_59	4G	53.982	4.1e-35	FusSpec4	Fusobacterium sp.	Bacteria;Fusobacteria;__c;Fusobacteriales;Fusobacteriaceae;Fusobacterium	98.214	5.12e-78	ferredoxin protochlorophyllide reductase subunit L [Roseivivax lentus]	SIS50445.1	ATCCACGACCTCGTCGAACCTGTCAGCAGCGTTTTCAAAACTGGGCAAGCGGGTCCTGCAGATTGGCTGCGACCCCAAGCATGACTCGACCTTTACACTCACGGGACAGCTGCAGCCAACGGTGATCGACATCCTCAAAGAGGTCGATTTCCACGCCGAAGAACTCCGCCCAGAGGACTTTGTCACCGAAGGGTTCAACGGCGTGCAATGTGTCGAGGCGGGTGGTCCGCCAGCAGGCACTGGCTGTGGCGGCTATGTGGTTGGGCAAACGGTGAAACTGCTAAAACAGCACCACATGCTCGAAGACACGGATGTCGTGATCTTTGACGTGTTGGGT	0	0	0	0	0	0	1	0	0	0	0	0	0	0	1	0	0	0	0	0	0	0	0	0	0	0	0	0	0	0	1	0	0	0	6752	0	0	0
OTU_60	4G	52.212	1.11e-33	FusSpec4	Fusobacterium sp.	Bacteria;Fusobacteria;__c;Fusobacteriales;Fusobacteriaceae;Fusobacterium	92.857	1.56e-75	TPA: ferredoxin:protochlorophyllide reductase (ATP-dependent) iron-sulfur ATP-binding protein, partial [Chromatiaceae bacterium]	HBG96056.1	ATCAACCACCTCGTCCAATCTGTCCGTGGCCTTTTCCACCCTTGGAAAGCGCGTCTTGCAGATCGGCTGTGACCCCAAGCACGACAGCACCTTTACCTTGACCGGGCATCTTCAGCCCACCGTGATTGATATCCTCAAAGAGGTCGATTTTCATCCCGAAGAGCTGAGGCCCGAGGATTTCGTGACCCAAGGGTTCAATGGCGTGCAATGCGTCGAGGCTGGTGGGCCCCCTGCCGGTACGGGATGTGGCGGCTATGTGGTGGGGCAGACGGTCAAACTGCTCAAGCAGCATCACATGCTGGAAGACACCGATGTGGTGATTTTCGATGTGTTGGGG	0	0	0	0	0	0	0	0	0	1	5020	0	4169	0	0	0	0	0	0	0	0	0	0	0	0	0	0	0	0	0	0	0	0	0	0	0	0	0
OTU_61	4I	52.212	1.09e-33	MnsHung2	Methanospirillum hungatei	Archaea;Euryarchaeota;Methanomicrobia;Methanomicrobiales;Methanospirillaceae;Methanospirillum	96.429	2.21e-77	photochlorophyllide reductase subunit L (chloroplast) [Corallina officinalis]	QJF58277.1	GTCAACTACGAGCTGCAATATTTCTGTTGCATTATCGCTCAGAGGTAAAAAAGTTCTTCAAATTGGTTGTGATCCTAAGCATGACAGTACTTTTACACTGACAGGGTTTTTGATACCTACAATTATTGATACTTTGCAGTCAAAAGATTATCATTATGAAGATGTTTGGCCAGAAGATGTAATTTATACAGGGTATGAAAATGTAGATTGTGTTGAGGCTGGTGGTCCACCAGCTGGCGCTGGATGTGGTGGTTATGTTGTGGGTGAAACCGTTAAACTTTTAAAAGAATTAAATGCTTTTGATCAGTATGATGTTATTTTATTCGATGTGCTTGGC	0	0	0	0	0	0	26	0	263	0	0	0	57	2868	6133	0	0	0	0	0	0	0	0	0	0	0	0	0	0	0	0	0	0	0	0	0	0	0
OTU_62	4I	51.304	1.01e-34	FusUlcer	Fusobacterium ulcerans	Bacteria;Fusobacteria;__c;Fusobacteriales;Fusobacteriaceae;Fusobacterium	95.536	3.07e-76	Light-independent protochlorophyllide reductase iron-sulfur ATP-binding protein [Hyphomicrobium sp. ghe19]	CAA2141215.1	GTCAACGACGTCATCAAATTTGTCGGCGGCATTTTCAAAGCTCGGCAAACGCGTCCTGCAAATTGGCTGTGACCCGAAGCACGATTCTACGTTCACGCTGACCAAGAGCCTTGTGCCGACGGTGATCGATGCCCTCGAAGAAGTGAACTTTCACTCTGAAGAACTCCGTGTCGAAGACTTCGTTTACGAAGGTTTCAATGGCGTCATGTGTGTGGAAGCCGGTGGCCCGCCGGCAGGCACTGGCTGCGGAGGCTATGTCGTCGGGCAGACGGTAAAACTCCTCAAAGAACATCACCTTTTGGAAGATACAGATGTCGTGATTTTCGATGTGTTGGGT	0	0	0	0	0	0	0	0	0	0	0	0	0	0	0	0	0	0	0	0	0	0	0	0	11395	0	1	0	0	0	1	0	0	0	0	0	0	0
OTU_63	4I	50.442	1.02e-33	FusNucl2	Fusobacterium nucleatum	Bacteria;Fusobacteria;__c;Fusobacterales;Fusobacteriaceae;Fusobacterium	99.107	3.52e-79	Protochlorophyllide reductase iron protein subunit (chloroplast) [Scinaia undulata]	YP_009314868.1	ATCAACTACTAGTTGTAATATATCAGTAGCTTTATCGTCTCGTGGTAAAAAAGTTTTACAAATTGGTTGTGATCCTAAACATGATAGTACTTTTACATTGACAGGTTTTTTAATTCCTACAATTATTGACACTCTTCAATCTAAGGATTATCACTATGAGGATGTATGGCCTGAGGATGTAATTTACAAAGGTTATGGTAATGTTGATTGTGTAGAAGCAGGAGGGCCACCTGCAGGTGCAGGTTGTGGTGGGTATGTTGTAGGTGAAACAGTTAAATTGTTGAAGGAATTAAATGCTTTTGATGAATATGATGTAATTTTGTTTGATGTTTTAGGT	161	902	0	1957	243	0	0	0	0	0	0	0	0	0	0	0	0	0	0	0	0	0	0	0	0	0	0	0	0	0	0	0	0	0	0	0	0	0
OTU_64	4I	53.097	1.18e-35	FusNucl2	Fusobacterium nucleatum	Bacteria;Fusobacteria;__c;Fusobacterales;Fusobacteriaceae;Fusobacterium	98.214	3.19e-79	ferredoxin:protochlorophyllide reductase (ATP-dependent) iron-sulfur ATP-binding protein [Sphaerospermopsis sp. SIO1G1]	NES99892.1	ATCAACAACTAGTTGCAATATTTCCGTAGCTCTAGCTAAAAGAGGCAAAAAAGTCTTACAAATTGGGTGCGACCCAAAACATGATAGTACTTTCACATTAACTGGATTTTTAATTCCAACAATTATCGATACTTTGCAAGAAAAAGACTATCATTATGAAGATGTTTGGCCTGAAGATGTCATCTACAAAGGTTATGGAGGAGTAGATTGTGTAGAAGCTGGCGGACCACCAGCTGGATCTGGATGTGGAGGTTACGTTGTTGGAGAGACAGTTAAATTACTTAAAGAATTAAACGCTTTTGACGAATACGATATCATTTTATTTGATGTCTTAGGA	0	0	0	0	0	0	40	0	2658	883	1058	0	0	0	0	0	0	0	0	0	0	0	0	0	0	0	0	0	0	0	0	0	0	0	0	0	0	0
OTU_65	4I	51.327	2.04e-35	FusNucl2	Fusobacterium nucleatum	Bacteria;Fusobacteria;__c;Fusobacterales;Fusobacteriaceae;Fusobacterium	98.214	1.04e-79	iron protein subunit of the light-independent protochlorophyllide reductase, partial [Synechococcus sp. PCC 7002]	AAA67137.1	ATCTACAACAAGCTGTAATATTTCAGTAGCCTTAGCAAAAAGAGGTAAAAAAGTCCTGCAAATAGGTTGCGATCCCAAACACGACAGTACTTTTACCCTAACAGGATTTCTCATCCCAACAATTATCGACACCCTACAACAAAAAGACTTTCACTACGAAGACATTTGGCCAGAAGATGTAATTTACAAGGGTTATGGAGGAGTTGACTGTGTAGAAGCGGGAGGCCCTCCTGCTGGTGCGGGTTGCGGCGGTTACGTAGTCGGAGAAACAGTTAAACTACTTAGAGAACTAAACGCCTTCGACGAATACGATGTCATCTTATTTGATGTCTTAGGG	0	0	0	0	0	0	0	0	0	0	0	0	0	0	0	0	0	0	0	84	1	0	1	3056	0	0	0	0	0	0	0	0	0	0	0	0	1407	0
OTU_66	4I	49.565	4.57e-34	FusUlcer	Fusobacterium ulcerans	Bacteria;Fusobacteria;__c;Fusobacteriales;Fusobacteriaceae;Fusobacterium	100	2.82e-80	Light-independent protochlorophyllide reductase subunit L (plastid) [Endarachne binghamiae]	YP_009505236.1	ATCGACAACGAGCTGTAATATTTCTGTAGCTCTATGTAGAAGAGGCAAACGTGTCTTACAAATTGGTTGTGATCCAAAACATGATAGTACATTTACTTTGACAGGATTTTTAATTCCAACAATTATAGATACATTACAAGCTAAAGACTATCATTATGAAGACATTTGGCCTGAAGACGTTATTTATCAAGGGTATGGTGGTGTAGATTGTGTAGAAGCTGGGGGACCCCCTGCTGGTGCCGGATGTGGTGGGTACGTAGTAGGAGAAACGGTAAAACTTTTAAAAGAGCTGAATGCTTTTGATGAGTACGATGTTATTTTATTTGATGTTTTAGGA	0	0	0	0	0	0	0	0	0	0	0	0	0	0	0	0	0	0	0	0	0	0	0	0	0	0	5347	0	0	0	0	0	0	0	0	0	0	0
OTU_67	4I	50.893	1.53e-34	SelNoxi2	Selenomonas noxia	Bacteria;Firmicutes;Negativicutes;Selenomonadales;Veillonellaceae;Selenomonas	95.536	7.7e-77	ferredoxin:protochlorophyllide reductase (ATP-dependent) iron-sulfur ATP-binding protein, partial [Betaproteobacteria bacterium]	NCX72023.1	GAGCACGACCTCATCCAATCTCTCGGCCGCCTTCTCCAAGCTCGGCAAGCGCGTGCTGCAGATTGGCTGCGACCCCAAGCACGACTCGACCTTCACCCTCACCAAGTCTCTGGTGCCGACCGTCATCGACGTGCTCGAGTCGGTGGACTTCCACACCGAAGAGCTGCGCGTCGAGGACTTCGTCTACGAAGGCTACAACGGTGTGATGTGCGTCGAGGCCGGTGGCCCGCCGGCCGGCACGGGCTGTGGCGGCTATGTCGTCGGCCAGACCGTCAAGCTGCTCAAGGCACATCACCTCTTGGATGACAGTGATGTCGTCATCTTCGATGTGCTCGGC	0	0	0	0	0	0	0	0	0	0	0	0	0	0	0	0	0	0	0	0	0	0	0	0	0	0	0	0	0	0	0	0	0	0	0	5859	0	0
OTU_68	4A	59.821	1.9e-43	DsrAuto2	Desulfobacterium autotrophicum	Bacteria;Proteobacteria;Deltaproteobacteria;Desulfobacterales;Desulfobacteraceae;Desulfobacterium	66.071	5.88e-52	AAA family ATPase, partial [Clostridium cochlearium]	NMA57899.1	GTCCACCATTTCGGCAAATTTGTCCGCAGCGATTGCATCACGGGGGAAGAAAGTGATGCAGGTTGGCTGCGACCCCAAGCATGATTCAACCAGGCAGTTGCTCAACGGTCATCCATCGGTTACGGTGCTGGAATATTTGCGCCAAGTCGCTCCCGATCAGTATTCGTTTGAAGACATTGTGAGCATCGGTTATGCGGGAGTGGCATGCGTGGAGGCCGGCGGCCCTGAACCGGGAGTGGGTTGTGCTGGCAGAGGAATTCTGAGCACTTTCAGTCTGCTGGAAAGCCTGGGAGTCCGGACACAAAATTATGATTTGATCTTGTACGATGTGTTGGGG	0	0	0	0	0	0	0	0	0	0	0	0	5661	0	0	0	0	0	0	0	0	0	0	0	0	0	0	0	0	0	0	0	0	0	0	0	0	0
OTU_69	1J	96.429	1.56e-74	ZymMobi4	Zymomonas mobilis	Bacteria;Proteobacteria;Alphaproteobacteria;Sphingomonadales;Sphingomonadaceae;Zymomonas	96.429	8.51e-76	nitrogenase iron protein [Rhodobacteraceae bacterium]	MBB93981.1	GTCGACCACCTCGCAGAACACGCTCGCCGCTCTCGTCGAGCTCCAGCAGAAAATTCTCATCGTCGGATGTGACCCCAAAGCGGACTCCACCCGTCTGATCCTGAACTCCAAGGCCCAGGACACCGTGCTGCACCTGGCCGCCGAAATGGGCTCGGTCGAGGACCTCGAACTCGAGGACGTGCTGAAGATCGGCTACAAGGACATCAAATGCGTTGAGTCCGGTGGCCCGGAGCCCGGCGTCGGCTGCGCCGGCCGCGGCGTGATCACCTCGATCAACTTCCTGGAAGAAAACGGCGCCTATGACGATGTCGACTACGTCTCCTACGACGTGCTTGGC	0	0	0	0	0	0	0	0	0	0	0	0	0	0	5039	0	0	0	0	0	0	0	0	0	0	0	0	0	0	0	0	0	0	0	0	0	0	0
OTU_70	1K	95.536	5.55e-76	XanAuto4	Xanthobacter autotrophicus	Bacteria;Proteobacteria;Alphaproteobacteria;Rhizobiales;Xanthobacteraceae;Xanthobacter	100	6.5e-79	dinitrogenase reductase, partial [Bradyrhizobium sp. Z15]	AIR93866.1	GTCGACCACCTCCCAAAACACCCTCGCGGCGCTCGCTGAGCTCGGCCACAAGATTCTGATCGTGGGTTGCGACCCGAAGGCCGACTCCACCCGCCTCATCCTGCACGCCAAGGCCCAGGACACCATCCTGAGCCTCGCCGCCGAACAAGGTAGCGTCGAGGACCTCGAACTCGAAGACGTGATGAAGATTGGCTACAAGGACATCCGTTGCGTGGAGTCCGGCGGTCCGGAGCCGGGCGTCGGCTGCGCCGGCCGCGGGGTGATCACCTCGATCAACTTCCTCGAGGAAAACGGCGCCTACGAGGACATCGACTACGTCTCCTACGACGTGCTGGGC	0	0	0	0	0	0	0	0	0	0	0	4	0	119	0	0	0	0	0	0	0	0	0	0	0	0	0	0	12	0	0	0	0	0	0	0	0	0
OTU_71	4G	52.174	8.5e-34	CanMeth2	Candidatus Methanoregula	Archaea;Euryarchaeota;Methanomicrobia;Methanomicrobiales;Generaincertaesedis;CandidatusMethanoregula	96.429	1.06e-77	Light-independent protochlorophyllide reductase iron-sulfur ATP-binding protein ChlL [Roseibacterium elongatum DSM 19469]	AHM03497.1	ATCTACGACATCTTCGAACTTGTCGGCGGCGTTCTCCAAGCTAGGGAAGCGGGTTTTGCAGATCGGCTGTGATCCCAAGCATGACAGCACGTTTACCTTGACTGGGCAGTTGCAGCCTACGGTGATTGATATCCTGAAGGACGTGGATTTCCATGCCGAGGAGCTGCGGCCTGAGGATTTTGTCACCGAAGGCTACAACGGAGTGATGTGTGTGGAGGCCGGTGGGCCTCCTGCGGGAACCGGCTGTGGCGGCTATGTGGTGGGGCAAACGGTAAAGCTCTTGAAGCAACACCATATGCTGGAAGACACCGATGTGGTGATTTTTGATGTGCTGGGT	0	0	0	0	0	0	0	0	0	0	2484	0	0	0	0	0	0	0	0	0	0	0	0	0	0	0	0	0	0	0	0	0	0	0	0	0	0	0
OTU_72	4I	51.304	8.7e-34	DstHaf20	Desulfitobacterium hafniense	Bacteria;Firmicutes;Clostridia;Clostridiales;Peptococcaceae;Desulfitobacterium	100	5.09e-81	protochlorophyllide reductase L subunit, partial [Erythrobacter sp. NAP1]	AAT79370.1	ATCGACCACGTCTTCGAACCTGTCAGCCGCATTCTCAAAGCTGGGCCACCGGGTACTCCAGATCGGCTGCGATCCCAAGCATGACAGCACGTTTACGCTTACCAAGAAGCTGATGCCGACGGTGATCGACGTGCTGGAAACGGTTGAGTTTCACTCTGAGGAACTGCGGCCAGAGGACTATATGTTCGAGGGCTATAACGGCGTGATGTGCGTCGAGGCTGGCGGGCCTCCTGCGGGCACTGGCTGCGGCGGCTATGTCGTTGGCCAAACTGTGAAGCTCCTCAAGCAGCATCACCTTCTTGAAGATACCGATGTCGTAATCTTCGACGTGCTGGGT	0	0	123	0	2532	0	0	0	0	0	0	0	0	0	0	0	0	0	0	0	0	0	0	0	0	0	0	0	0	0	0	0	0	0	0	0	0	0
OTU_73	4I	50.442	8.47e-34	FusNucl2	Fusobacterium nucleatum	Bacteria;Fusobacteria;__c;Fusobacterales;Fusobacteriaceae;Fusobacterium	100	2.39e-80	protochlorophyllide reductase iron proteinsubunit (chloroplast) [Ostreobium sp. HV05042]	ARQ82247.1	ATCAACAATGAGTTGTAATATATCTATAGCATTTGCGAGACGAGGTAAAAAAGTTTTGCAGATAGGCTGTGACCCGAAACATGATAGTACTTTTACATTAACAGGTTTTTTAATTCCTACAATTATAGATACATTACAATCAAAAGATTATCATTATGAAGACGTCTGGCCAGAAGACATAATCTATAAAGGCTATAGTGGAGTTGACTGTGTTGAAGCAGGTGGACCCCCTGCCGGAGCAGGTTGTGGAGGATATGTAGTAGGCGAAACAGTCAAATTGTTAAAGGAGTTAAATGCTTTTTATGAATATGATGTTATTCTATTTGATGTTTTAGGT	3	512	29	2489	195	17	0	0	0	0	475	75	71	0	0	0	0	0	0	0	0	0	0	0	0	0	0	0	0	0	0	0	0	0	0	0	0	0
OTU_74	4I	50.435	5.3e-33	CanMeth2	Candidatus Methanoregula	Archaea;Euryarchaeota;Methanomicrobia;Methanomicrobiales;Generaincertaesedis;CandidatusMethanoregula	97.321	1.02e-77	ferredoxin:protochlorophyllide reductase (ATP-dependent) iron-sulfur ATP-binding protein, partial [Gammaproteobacteria bacterium]	NBQ12614.1	GAGCACGACCTCGTCGAACCTCTCTGTCGCCTTTTCCAAGCTCGGCAAGCGTGTCCTGCAGATCGGCTGCGACCCCAAGCACGATTCCACCTTCACGCTGACCAAGCAGCTGATGCCGACGGTGATCGACGTCCTGGAGTCCGTGGACTTCCATCCGGAGGAGCTGCGGGTCGAGGACTTCGTTTACGAGGGCTACAACGGTGTGATGTGCGTCGAGGCCGGCGGCCCGCCGGCCGGCACCGGCTGCGGCGGCTACGTCGTCGGCCAGACGGTCAAGCTCCTCAAGGAGCACCACCTGCTGGAAGACACGGACGTCGTGATCTTCGACGTCCTCGGC	0	2	0	0	0	0	3	0	0	0	0	0	0	0	0	0	0	0	0	0	0	0	0	0	0	0	0	0	0	0	0	0	0	0	0	0	0	0
OTU_75	4I	51.786	2.42e-35	SelNoxi2	Selenomonas noxia	Bacteria;Firmicutes;Negativicutes;Selenomonadales;Veillonellaceae;Selenomonas	93.75	5.06e-75	ferredoxin:protochlorophyllide reductase (ATP-dependent) iron-sulfur ATP-binding protein [Boseongicola sp.]	NNL18246.1	GTCGACGACCTCGTCGAACCTGTCCGCCGCGTTCTCTACGATGGGCAAGCGTGTGCTTCAGATCGGGTGCGATCCGAAGCACGATTCGACCTTCACACTGACCGGATCTCTGGTGCCGACAGTGATCGACACCCTGAAGGAGGTCGATTTCCACGCCGAGGAGTTACGGCCCGAAGACTTCGTCCACGAGGGGTGGGGCGGGGTGATGTGCGTCGAGGCCGGGGGGCCCCCTGCCGGGACGGGATGCGGCGGTTACGTTGTCGGGCAGACCGTGAAGCTCCTGAAGCAGCATCACCTGCTCGAGGATACGGATGTCGTCATCTTCGACGTGCTGGGC	2869	0	0	0	0	0	0	0	0	0	0	0	0	0	0	0	0	0	0	0	0	0	0	0	0	0	0	0	0	0	0	0	0	0	0	0	0	0
OTU_76	1J	93.75	4.47e-73	ZymMobi4	Zymomonas mobilis	Bacteria;Proteobacteria;Alphaproteobacteria;Sphingomonadales;Sphingomonadaceae;Zymomonas	95.536	2.62e-75	nitrogenase iron protein [Rhodobacteraceae bacterium]	MBB93981.1	ATCCACGACCTCTCAAAACACTCTCGCAGCTCTTGTCGAGCTCGAACAAAAGATCCTCATCGTGGGCTGTGACCCCAAAGCGGACTCTACCCGCTTGATTCTAAACTCAAAAGCGCAAGACACCGTGCTTCACATGGCCGCCGAAATGGGCTCCGTGGAAGACCTTGAGCTCGAAGATGTTTTGAAAATTGGCTATCAAGATATCAAATGCGTTGAGTCCGGTGGCCCCGAGCCCGGAGTGGGCTGCGCCGGTCGTGGCGTGATCACCGCCATCAACTTCCTCGAAGAAAACGGTGCTTACGACGATGTCGATTACGTCTCTTATGACGTTTTGGGC	0	0	0	0	0	0	0	0	0	0	0	0	0	0	0	0	0	0	0	0	0	0	0	0	0	0	3792	0	0	0	0	0	0	0	0	0	0	0
OTU_77	1J	99.107	8.33e-78	RhdPal42	Rhodopseudomonas palustris	Bacteria;Proteobacteria;Alphaproteobacteria;Rhizobiales;Bradyrhizobiaceae;Rhodopseudomonas	98.214	1.62e-77	reductase of nitrogenase, partial [Rhodopseudomonas oryzae]	BAF62116.1	GTCCACCACCTCGCAGAACACCCTCGCGGCGCTGGTCGATCTCGGTCAGAAGATCCTGATCGTCGGCTGCGATCCCAAGGCGGACTCCACCCGCCTGATCCTCAACACCAAGATGCAGGACACCGTGCTCAGCCTCGCGGCCGAAGCCGGCTCGGTCGAGGACCTCGAACTCGAAGACGTGATGAAGATCGGCTACAAGGGCATCAAGTGCACCGAAGCCGGCGGTCCGGAGCCGGGCGTGGGCTGCGCCGGCCGCGGCGTCATCACCGCGATCAACTTCCTCGAAGAGAACGGCGCCTATGAGGACGTCGACTACGTCTCCTACGACGTGCTCGGC	0	0	0	0	2	0	0	0	0	1	64	81	0	69	2	0	22	0	0	0	0	0	39	16	1	0	0	10	0	0	0	0	9	0	3	0	313	12
OTU_78	4I	52.174	1.22e-33	CanMeth2	Candidatus Methanoregula	Archaea;Euryarchaeota;Methanomicrobia;Methanomicrobiales;Generaincertaesedis;CandidatusMethanoregula	99.107	4.27e-79	ferredoxin:protochlorophyllide reductase (ATP-dependent) iron-sulfur ATP-binding protein [Sphingomonas sp.]	RZM06434.1	ATCGACCACCTCGTCCAACCTGTCGGCCGCTTTCTCGCTGCTCGGCAAGCGCGTGCTGCAGATCGGCTGCGATCCCAAGCATGACAGCACCTTCACGCTGACCAAGAAATTGATGCCGACGGTGATCGACGTGCTCGAGACGGTCGAATTCCATGCCGAGGAATTGCGGCCCGAAGATTATATGTTCGAGGGCTTTAACGGCGTGATGTGTGTCGAGGCGGGGGGGCCGCCAGCGGGCACGGGCTGCGGCGGCTATGTCGTCGGGCAGACGGTCAAATTGCTCAAACAGCACCATTTGCTCGAAGAAACCGACGTGGTGCTGTTCGACGTGCTGGGG	4	0	0	0	1	1	0	24	0	2	0	0	0	2	18	9	7	0	19	13	1310	0	2	14	1033	9	269	0	0	6	10	3	1	7	0	0	476	2
OTU_79	1J	93.75	4.38e-73	ZymMobi4	Zymomonas mobilis	Bacteria;Proteobacteria;Alphaproteobacteria;Sphingomonadales;Sphingomonadaceae;Zymomonas	96.429	7.23e-76	nitrogenase iron protein [Rhodobacteraceae bacterium]	MBB93981.1	GTCGACCACCTCACAAAACACGCTGGCAGCCCTTGTTGAGCTGCAGCAAAAAATCTTGATCGTCGGCTGTGACCCCAAAGCGGACTCCACCCGTCTGATCCTGAACTCCAAAGCGCAGGACACCGTTCTGCACATGGCAGCTGAAATGGGTTCGGTCGAAGACCTCGAGCTCGAAGACGTTCTGAAGGTCGGCTACCAGGACATCAAATGTGTGGAATCCGGTGGTCCAGAGCCTGGTGTGGGCTGCGCGGGTCGCGGCGTGATCACCGCAATCAACTTCCTGGAAGAAAACGGCGCTTATGACGACGTGGACTATGTGTCCTACGACGTGCTTGGC	0	0	0	0	0	0	0	0	0	1	0	0	0	0	3226	0	0	0	0	0	0	0	0	0	0	0	0	0	0	0	0	0	0	0	0	0	0	0
OTU_80	4I	50.442	3.19e-33	FusNucl2	Fusobacterium nucleatum	Bacteria;Fusobacteria;__c;Fusobacterales;Fusobacteriaceae;Fusobacterium	97.321	4.25e-79	Protochlorophyllide reductase iron protein subunit (chloroplast) [Halimeda micronesica]	AYC64006.1	ATCAACAATAAGTTGTAATCTCTCCATAGCTTTAGCTCGACGTGGACAAAAGGTTTTGCAAATTGGTTGTGACCCAAAACATGATAGTACTTTTACTTTAACAAATTTTTTAATACCAACTATAATTGATACTTTACAAGCTAAAGATTATCATTATGAAGATGTTTGGCCGGAAGATGTTATATACAAAGGATATGGAGGTGTTTCCTGTGTAGAAGCCGGTGGTCCTCCAGCTGGTGCAGGATGTGGTGGTTACGTAGTCGGTGAGACTGTAAAACTTTTAAAAGAATTAAATGCGTTTTATGAATATGATGTTATTATTTTTGACGTTTTAGGG	1	0	0	0	0	0	0	0	0	0	3243	0	9	0	0	0	0	0	0	0	0	0	0	0	0	0	0	0	0	0	0	0	0	0	0	0	0	0
OTU_81	4G	53.097	5.58e-34	FusNucl2	Fusobacterium nucleatum	Bacteria;Fusobacteria;__c;Fusobacterales;Fusobacteriaceae;Fusobacterium	92.857	2.46e-75	ferredoxin:protochlorophyllide reductase (ATP-dependent) iron-sulfur ATP-binding protein [Maritimibacter sp.]	MAM62909.1	ATCGACGACGTCGTCGAACCTGTCGGCTGCGTTCTCGACTTTGGGCAAGCGCGTTTTGCAGATCGGGTGCGATCCGAAGCATGACAGCACGTTTACGCTGACGGGGCGTTTGCAGCCCACGGTGATCGATATTCTGAAGGAGGTGGACTTTCACCCCGAAGAGCTGCGGCCCGAGGACTTTCTGACGGAAGGCTTTGGCGGTGTGCAATGCGTCGAGGCGGGGGGGCCGCCTGCGGGGACAGGCTGCGGCGGTTATGTCGTGGGGCAGACGGTGAAGCTTTTGAAGCAGCATCATCTGCTGGAAGAGACAGATGTGGTGATCTTTGACGTTCTGGGG	0	0	0	0	0	0	0	0	0	0	0	0	0	0	0	0	0	0	0	0	0	0	0	0	0	0	0	0	0	0	0	0	0	0	0	0	0	0
OTU_82	4G	51.327	2.18e-34	SelNoxi2	Selenomonas noxia	Bacteria;Firmicutes;Negativicutes;Selenomonadales;Veillonellaceae;Selenomonas	97.321	1.22e-77	Light-independent protochlorophyllide reductase iron-sulfur ATP-binding protein ChlL [Roseibacterium elongatum DSM 19469]	AHM03497.1	ATCGACCACCTCGTCCAACTTGTCAGCCGCCTTTTCCAAGCTGGGCAAGCGCGTGCTGCAGATCGGGTGCGATCCCAAACATGACAGCACCTTTACGTTGACTGGGCAGTTGCAGCCCACAGTCATCGATATTCTGAAAGATGTGGACTTCCACGCGGAGGAGTTGCGCCCCGAAGATTTCGTCACCGAAGGCTATAATGGCGTGATGTGTATCGAGGCGGGCGGCCCGCCTGCCGGCACCGGCTGCGGCGGCTATGTTGTGGGTCAGACCGTGAAACTGCTGAAGCAGCATCACTTGCTGGACGACACAGATGTCGTGATCTTTGACGTGCTGGGC	0	1	55	2193	0	0	0	0	0	0	0	0	0	0	0	0	0	0	0	0	0	0	0	0	0	0	0	0	0	0	0	0	0	0	0	0	0	0
OTU_83	1B	93.75	2.73e-72	AnaVar12	Anabaena variabilis	Bacteria;Cyanobacteria;__c;Nostocales;Nostocaceae;Anabaena	100	3.84e-78	nitrogenase iron protein [Leptolyngbya sp. SIO1E4]	NER70773.1	ATCTACCACTTCTCAAAACACCATTGCAGGTCTAGCCGATACTCAGCGCATTATGATTGTGGGCTGCGACCCCAAAGCTGACTCCACCCGACTGATGCTTCACAGCAAAGCCCAAACCACCATTCTGCACCTGGCTGCAGAGCGGGGCGCTGTTGAAGACCTGGAACTCGACGAAGTGCTACTCACAGGCTACAAGAACGTTAAGTGCGTTGAGTCTGGTGGTCCTGAGCCCGGTGTCGGCTGTGCTGGTCGAGGCATCATTACTGCCATTAACTTCCTCGAGGAGGAAGGTGCTTACGAAGATCTCGACTTCGTTTCTTATGATGTATTGGGC	0	0	0	0	0	0	0	0	0	0	0	0	0	0	0	0	0	0	0	0	23780	0	1	0	0	0	0	0	0	0	0	0	0	0	0	1	0	0
OTU_84	1B	89.189	6.26e-71	CnbUCYNA	cyanobacterium UCYN-A	Bacteria;Cyanobacteria;__c;Chroococcales;__f;__g	96.396	1.06e-75	nitrogenase Fe protein [Cyanobacterium sp. NBRC 102756]	AFP43337.1	ATCCACCACTTCTCAAAACACCATCGCAGCGCTATCCGAAAATATGCGCGTCATGATCGTAGGTTGCGACCCTAAAGCAGACTCTACCCGCTTAATGCTTCACTGTAAAGCCCAAACCACCATTCTGCACTTAGCAGCAGAGCGCGGAGCAGTTGAAGATCTGGAACTCGAAGAAGTGCTGTTAACCGGTTACAACAACGTCCGTTGCGTTGAGTCCGGCGGTCCAGAACCCGGTGTAGGTTGCGCAGGACGTGGTATCATCACCGCCATCAACTTCTTAGAAGAAGAAGGTGCTTACGAAGACCTAGATTTAGTATCCTACGACGTATTGGGT	0	0	0	0	0	0	0	0	0	0	0	0	0	0	2651	0	0	0	0	0	0	0	0	0	0	0	0	0	0	0	0	0	0	0	0	0	0	0
OTU_85	1B	90.09	8.82e-72	CntSpec6	Cyanothece sp.	Bacteria;Cyanobacteria;__c;Chroococcales;__f;Cyanothece	98.198	7.96e-78	nitrogenase reductase, partial [Nodosilinea nodulosa PCC 7104]	ALE60476.1	GTCCACTACATCTCAAAACACGATTGCAAGTATGGCCGATCGCAACCGCATCATGATTGTAGGTTGTGACCCCAAGGCTGACTCCACTCGCTTGATGCTTCACAGCAAGGCTCAGACCACAATTCTGCACCTGGCCGCTGAGCGTGGCGCAGTTGAAGACCTCGAGCTTGATGAAGTTCTACTCACTGGCTATAAGAACGTGAAGTGCGTTGAGTCGGGTGGTCCTGAGCCTGGCGTCGGGTGTGCAGGCCGAGGCATCATCACCGCCATCAACTTCTTAGAAGAAGAAGGCGCATACGAAGACCTCGACTTTGTTTCCTACGACGTATTGGGT	0	0	0	0	0	0	0	0	0	0	0	0	0	0	0	0	0	0	0	0	0	1	0	0	0	1	0	0	0	0	0	0	0	0	10328	0	0	0
OTU_86	1B	93.75	2.73e-72	AnaVar12	Anabaena variabilis	Bacteria;Cyanobacteria;__c;Nostocales;Nostocaceae;Anabaena	100	3.84e-78	nitrogenase iron protein [Leptolyngbya sp. SIO1E4]	NER70773.1	GTCCACCACCTCCCAAAACACCATTGCTGGCTTGGCGGATACTCAGCGCATCATGATCGTAGGCTGCGATCCTAAAGCAGATTCCACCCGTTTGATGCTTCACAGTAAAGCTCAAACCACCATTCTGCACTTGGCGGCTGAGCGGGGCGCTGTAGAGGATCTAGAACTCGACGAAGTGCTACTCACCGGCTACAAAAACGTCAAGTGTGTTGAATCCGGTGGTCCTGAGCCTGGCGTTGGTTGCGCCGGTCGGGGCATCATCACCGCCATCAACTTCCTAGAGGAAGAAGGCGCCTACGAAGACCTCGATTTCGTCTCCTACGACGTATTAGGC	0	0	3	0	0	968	0	0	4	0	0	1	0	0	0	0	0	0	0	0	0	1	0	0	0	0	0	0	0	0	0	0	0	0	0	0	3095	0
OTU_87	1B	89.189	9.47e-71	CnbUCYNA	cyanobacterium UCYN-A	Bacteria;Cyanobacteria;__c;Chroococcales;__f;__g	97.297	5.81e-76	nitrogenase Fe protein [Cyanobacterium sp. NBRC 102756]	AFP43337.1	GTCCACCACTTCTCAAAACACGATCGCAGCCCTGTCTGAAAATCTGCGTGTCATGATCGTTGGTTGCGACCCGAAAGCAGACTCTACTCGCTTGATGCTGCACTGTAAAGCTCAAACCACCATTCTGCACTTAGCCGCAGAACGGGGTGCTGTCGAAGACCTGGAACTGGAAGAAGTGCTGCTGACTGGATACAACAACGTGCGTTGCGTTGAGTCCGGCGGTCCAGAACCCGGTGTAGGTTGCGCGGGACGTGGTATCATCACCGCCATCAACTTCCTGGAAGAAGAAGGCGCTTACGAAGACCTAGACCTGGTTTCCTACGACGTGTTGGGC	0	0	0	0	0	0	0	0	0	0	0	0	0	0	0	0	0	0	0	0	0	0	0	0	0	0	4164	0	0	0	0	0	0	0	0	0	0	0
[truncated: 3 more columns]
